# Supplementary material for: Cancer Incidence and Mortality Estimates in Arab Countries in 2018: A GLOBOCAN Data Analysis
Source: PubMed Central journal article supplement — Cancer Epidemiol Biomarkers Prev. 2023 Sep 21;32(12):1738–46. doi: 10.1158/1055-9965.EPI-23-0520 (PMC10690144; doi:10.1158/1055-9965.epi-23-0520), 2023-09-21
Supplement: epi-23-0520_figure_s1_suppsf1.pdf [file epi-23-0520_figure_s1_suppsf1.pdf]

**Figure S1**

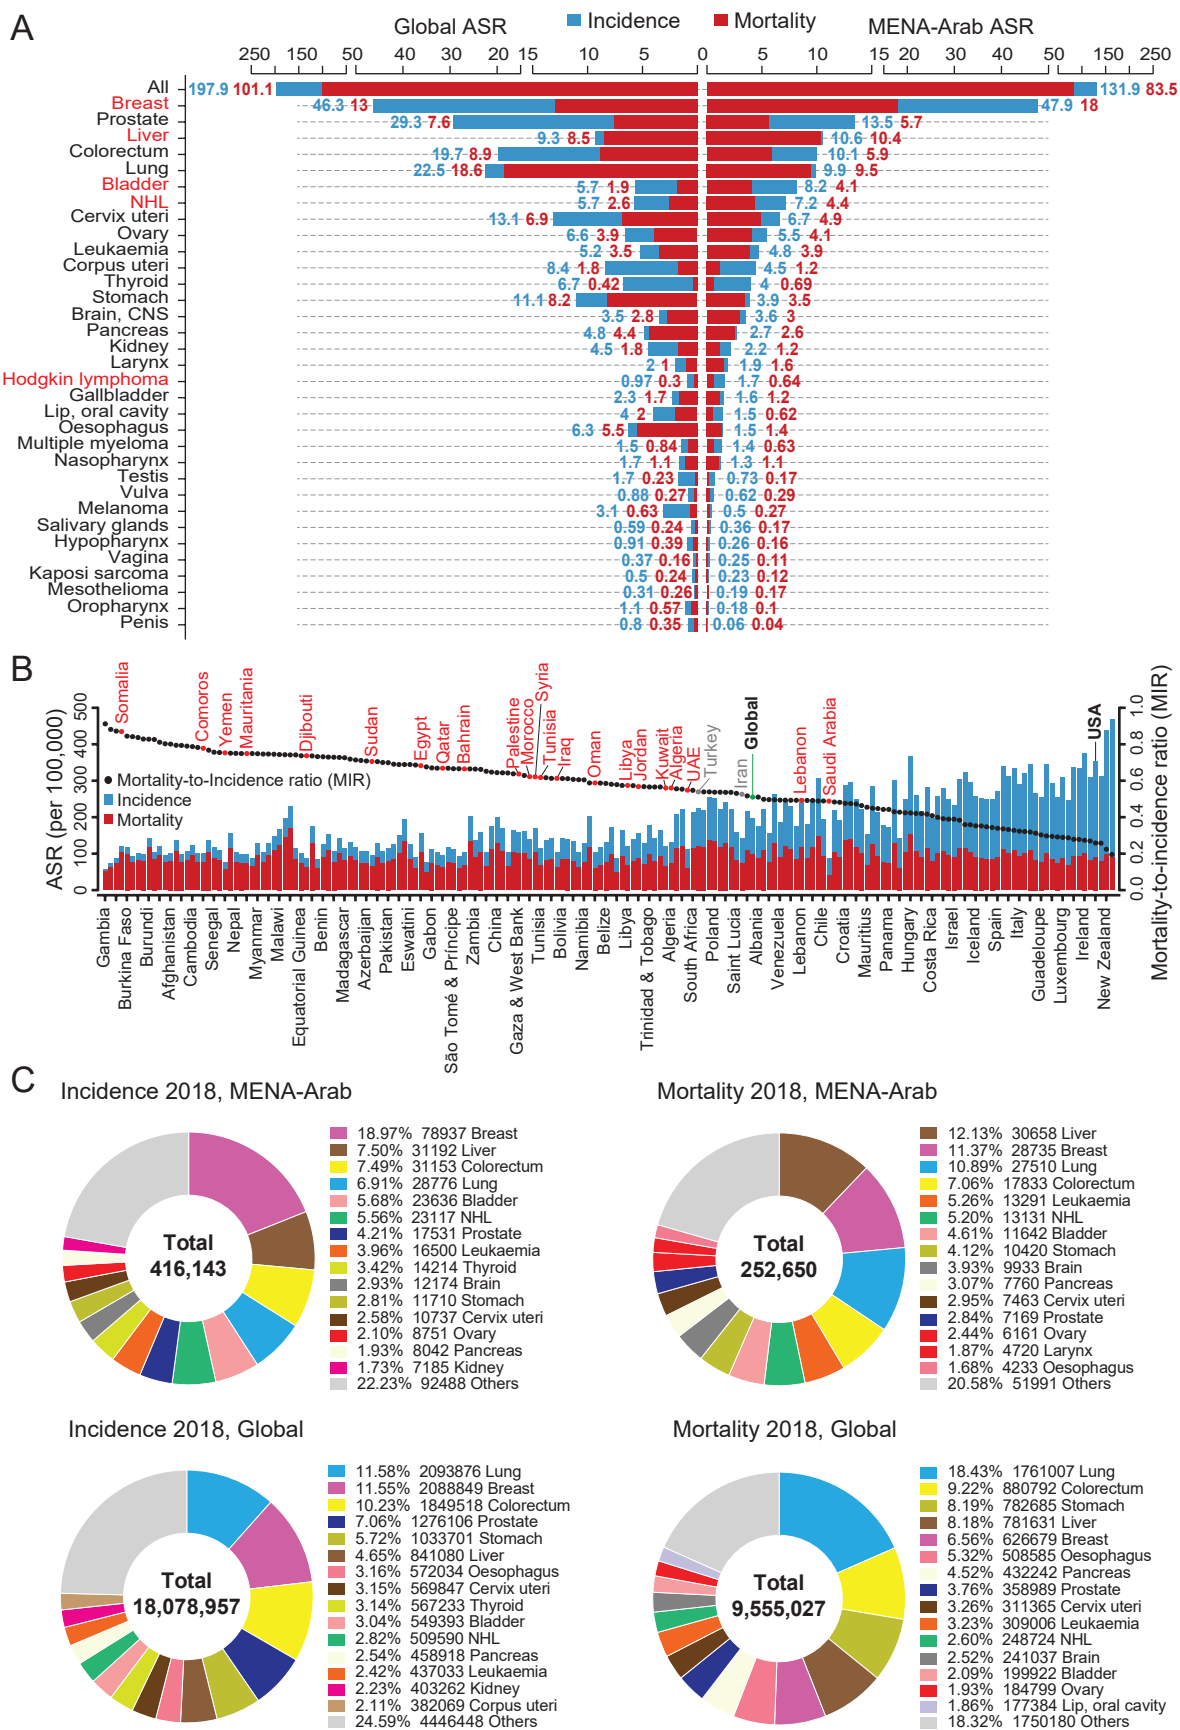

**Figure S1: Age-standardized rate (ASR) for cancer incidence and mortality, and mortality-to-incidence ratio (MIR) in both sexes in 2018.** (A) Comparison of ASR (per 100,000 people) in Arab countries in the MENA region (right) to the worldwide (global) ASR (left) for cancer incidence (blue) and cancer mortality (red) in 2018 for all ages. ASR is shown for all cancers and each cancer site. Cancer sites are ranked according to ASR incidence in the MENA-Arab region. The ASR for incidence and mortality are shown in blue and red, respectively. Cancer sites that are labelled in red had higher incidence and mortality in the MENA-Arab region than the global rates in 2018. (B) ASR for incidence (blue) and mortality (red) for all cancers in 2018 in both sexes for all ages in 186 countries. Countries were ranked according to the mortality-to-incidence ratio (MIR); mortality ASR divided by incidence ASR (black dots). The 22 Arab countries are labelled in red. (C) Top 15 cancer sites for incidence (B) and mortality (C) in both sexes, in 2018 for all ages, in the MENA region and worldwide. The total number of cases is shown in the middle of the donut graphs; the percentage contribution and the number of cases of each cancer site are shown in the legends.
