# Supplementary material for: Cancer Incidence and Mortality Estimates in Arab Countries in 2018: A GLOBOCAN Data Analysis
Source: PubMed Central journal article supplement — Cancer Epidemiol Biomarkers Prev. 2023 Sep 21;32(12):1738–46. doi: 10.1158/1055-9965.EPI-23-0520 (PMC10690144; doi:10.1158/1055-9965.epi-23-0520), 2023-09-21
Supplement: epi-23-0520_figure_s5_suppsf5.pdf [file epi-23-0520_figure_s5_suppsf5.pdf]

**Figure S5: Age-specific incidence of cancers in Arab countries.** The ASIR for cancers at different age groups in Arab countries are summarized and compared to the ASIR at the same age groups for the World, USA and Europe. Arab countries are labelled as those in the Arabian Gulf (maroon), the Levant (green) and North Africa (blue). The world, USA and Europe in black font. Each cancer type is shown on a separate page in the following pages organized alphabetically. For all age groups please refer to Supplementary Data Tables S1 and S2.

# Bladder

## Females

|            | 20-54 | 55-69      | 70-85+ |            |      |
|------------|-------|------------|--------|------------|------|
| Kuwait     | 0.19  | S.Arabia   | 4.8    | Mauritania | 9.8  |
| UAE        | 0.19  | Morocco    | 5.1    | Sudan      | 11.4 |
| Bahrain    | 0.39  | Jordan     | 5.2    | S.Arabia   | 12.0 |
| Qatar      | 0.41  | Palestine  | 5.3    | Somalia    | 12.7 |
| Morocco    | 0.42  | Oman       | 5.7    | Morocco    | 14.4 |
| Tunisia    | 0.51  | Sudan      | 5.9    | Libya      | 17.2 |
| S.Arabia   | 0.59  | Tunisia    | 6.6    | Oman       | 19.1 |
| Oman       | 0.63  | Somalia    | 7.3    | UAE        | 20.1 |
| Libya      | 0.65  | Mauritania | 7.5    | Jordan     | 21.9 |
| Algeria    | 0.66  | Algeria    | 7.8    | Algeria    | 23.6 |
| Palestine  | 0.68  | Bahrain    | 8.0    | World      | 26.0 |
| Sudan      | 0.72  | World      | 8.7    | Tunisia    | 26.5 |
| Somalia    | 0.75  | Kuwait     | 9.3    | Iraq       | 26.6 |
| World      | 0.85  | Libya      | 10.0   | Qatar      | 28.0 |
| Jordan     | 0.86  | Qatar      | 12.2   | Kuwait     | 33.8 |
| Iraq       | 1.10  | UAE        | 14.6   | Bahrain    | 38.1 |
| Egypt      | 1.40  | Iraq       | 16.3   | Palestine  | 39.7 |
| Mauritania | 1.40  | Europe     | 17.0   | Europe     | 41.2 |
| USA        | 1.60  | Syria      | 19.2   | Syria      | 45.6 |
| Europe     | 1.80  | USA        | 20.6   | Egypt      | 49.1 |
| Syria      | 2.00  | Egypt      | 24.0   | USA        | 54.8 |
| Lebanon    | 4.10  | Lebanon    | 37.0   | Lebanon    | 86.5 |

## Males

|            | 20-54 | 55-69      | 70-85+ |            |       |
|------------|-------|------------|--------|------------|-------|
| UAE        | 0.56  | Sudan      | 11.7   | Somalia    | 25.3  |
| Qatar      | 1.10  | Mauritania | 12.2   | Mauritania | 30.8  |
| Kuwait     | 1.30  | Somalia    | 13.1   | Sudan      | 31.1  |
| Bahrain    | 1.40  | S.Arabia   | 15.7   | S.Arabia   | 33.6  |
| Mauritania | 1.90  | Qatar      | 22.3   | Oman       | 85.8  |
| Somalia    | 2.00  | Kuwait     | 24.0   | Morocco    | 100.0 |
| S.Arabia   | 2.10  | Oman       | 26.6   | Qatar      | 100.4 |
| World      | 2.30  | UAE        | 30.0   | Iraq       | 107.7 |
| Sudan      | 2.40  | Bahrain    | 34.8   | Kuwait     | 109.8 |
| Morocco    | 2.70  | World      | 35.8   | World      | 114.1 |
| Oman       | 3.30  | Morocco    | 41.2   | UAE        | 119.1 |
| Algeria    | 3.50  | Palestine  | 41.6   | Bahrain    | 122.6 |
| Iraq       | 3.60  | Libya      | 55.1   | Algeria    | 126.4 |
| Libya      | 3.70  | Iraq       | 56.1   | Jordan     | 179.7 |
| Palestine  | 4.20  | Jordan     | 56.6   | Tunisia    | 189.6 |
| USA        | 4.60  | Algeria    | 57.7   | Egypt      | 191.7 |
| Europe     | 5.00  | Tunisia    | 67.1   | Libya      | 194.6 |
| Jordan     | 5.80  | USA        | 76.9   | Palestine  | 200.4 |
| Tunisia    | 6.00  | Europe     | 83.5   | Europe     | 218.6 |
| Egypt      | 6.40  | Egypt      | 83.9   | Syria      | 228.5 |
| Syria      | 7.80  | Syria      | 89.4   | USA        | 236.7 |
| Lebanon    | 15.90 | Lebanon    | 153.6  | Lebanon    | 397.9 |

# Brain, CNS

## Females

|            | 0-14 | 15-29      | 30-54      | 55-69     | 70-85+     |
|------------|------|------------|------------|-----------|------------|
| Mauritania | 0.23 | Qatar      | Mauritania | 0.83      | Mauritania |
| Somalia    | 0.37 | Mauritania | UAE        | Sudan     | Qatar      |
| Sudan      | 0.53 | Oman       | Somalia    | S.Arabia  | Sudan      |
| S.Arabia   | 0.93 | Kuwait     | Bahrain    | Somalia   | Somalia    |
| Morocco    | 0.97 | UAE        | S.Arabia   | Oman      | Morocco    |
| Oman       | 0.97 | Somalia    | Sudan      | Morocco   | S.Arabia   |
| World      | 1.10 | Sudan      | Kuwait     | Tunisia   | Oman       |
| Iraq       | 1.10 | Morocco    | Morocco    | Qatar     | Libya      |
| Kuwait     | 1.10 | Bahrain    | Qatar      | Kuwait    | Tunisia    |
| Qatar      | 1.10 | S.Arabia   | Libya      | Palestine | Algeria    |
| Tunisia    | 1.20 | World      | Oman       | World     | Bahrain    |
| Jordan     | 1.40 | Jordan     | Tunisia    | Libya     | Jordan     |
| Syria      | 1.40 | Libya      | World      | Algeria   | Kuwait     |
| Libya      | 1.50 | Palestine  | Palestine  | Jordan    | World      |
| Algeria    | 1.80 | Iraq       | Jordan     | Lebanon   | Syria      |
| Lebanon    | 1.80 | Tunisia    | USA        | Syria     | Iraq       |
| Egypt      | 1.90 | Syria      | Egypt      | USA       | Lebanon    |
| Palestine  | 1.90 | Algeria    | Algeria    | Iraq      | USA        |
| UAE        | 1.90 | Egypt      | Europe     | Bahrain   | Palestine  |
| Europe     | 2.20 | Europe     | Syria      | Egypt     | Europe     |
| Bahrain    | 2.70 | Lebanon    | Lebanon    | Europe    | Egypt      |
| USA        | 3.40 | USA        | Iraq       | UAE       | UAE        |

## Males

|            | 0-14 | 15-29      | 30-54      | 55-69     | 70-85+     |
|------------|------|------------|------------|-----------|------------|
| Mauritania | 0.33 | Mauritania | Mauritania | 1.6       | Mauritania |
| Sudan      | 0.36 | UAE        | UAE        | Sudan     | Morocco    |
| Somalia    | 0.48 | Sudan      | Sudan      | Qatar     | Oman       |
| Qatar      | 1.00 | Somalia    | Kuwait     | Somalia   | Somalia    |
| Bahrain    | 1.30 | Kuwait     | Qatar      | S.Arabia  | Tunisia    |
| World      | 1.30 | Qatar      | Somalia    | Morocco   | UAE        |
| Kuwait     | 1.30 | Oman       | Bahrain    | Oman      | S.Arabia   |
| Libya      | 1.40 | S.Arabia   | S.Arabia   | Kuwait    | Bahrain    |
| S.Arabia   | 1.40 | Morocco    | Morocco    | UAE       | Qatar      |
| Iraq       | 1.50 | Tunisia    | Oman       | Tunisia   | Libya      |
| UAE        | 1.50 | Bahrain    | World      | Bahrain   | Algeria    |
| Oman       | 1.90 | Libya      | Tunisia    | World     | Lebanon    |
| Egypt      | 2.00 | Palestine  | Algeria    | Algeria   | Kuwait     |
| Syria      | 2.00 | Algeria    | Palestine  | Palestine | Syria      |
| Algeria    | 2.10 | World      | Egypt      | Egypt     | Jordan     |
| Morocco    | 2.10 | Iraq       | USA        | Lebanon   | World      |
| Tunisia    | 2.20 | Jordan     | Libya      | Syria     | Sudan      |
| Jordan     | 2.40 | Syria      | Jordan     | Jordan    | Iraq       |
| Palestine  | 2.40 | Egypt      | Iraq       | USA       | Palestine  |
| Europe     | 2.50 | Europe     | Europe     | Iraq      | USA        |
| Lebanon    | 2.50 | Lebanon    | Syria      | Libya     | Europe     |
| USA        | 3.80 | USA        | Lebanon    | Europe    | Egypt      |

# Breast

20-34

|            |      |
|------------|------|
| Qatar      | 5.3  |
| Kuwait     | 5.4  |
| Bahrain    | 7.0  |
| UAE        | 7.7  |
| Mauritania | 9.8  |
| Libya      | 10.2 |
| S.Arabia   | 11.2 |
| Iraq       | 12.5 |
| World      | 12.6 |
| Oman       | 13.2 |
| Jordan     | 14.6 |
| Tunisia    | 14.6 |
| Palestine  | 14.8 |
| USA        | 15.5 |
| Egypt      | 15.6 |
| Europe     | 16.6 |
| Morocco    | 16.6 |
| Sudan      | 19.3 |
| Somalia    | 23.2 |
| Algeria    | 26.6 |
| Syria      | 27.1 |
| Lebanon    | 28.8 |

35-49

|            |       |
|------------|-------|
| Mauritania | 46.3  |
| Libya      | 48.4  |
| S.Arabia   | 52.4  |
| Qatar      | 55.6  |
| Tunisia    | 60.1  |
| Kuwait     | 63.8  |
| Bahrain    | 69.1  |
| Oman       | 69.2  |
| World      | 72.1  |
| Sudan      | 73.4  |
| Iraq       | 74.2  |
| UAE        | 74.6  |
| Somalia    | 75.8  |
| Egypt      | 87.7  |
| Palestine  | 93.9  |
| Morocco    | 98.6  |
| Jordan     | 101.9 |
| Europe     | 114.3 |
| USA        | 115.5 |
| Algeria    | 118.9 |
| Syria      | 121.8 |
| Lebanon    | 181.2 |

50-69

|            |       |
|------------|-------|
| Libya      | 64.5  |
| Mauritania | 78.4  |
| S.Arabia   | 78.9  |
| Tunisia    | 89.6  |
| Sudan      | 98.4  |
| Oman       | 102.3 |
| Somalia    | 110.9 |
| Iraq       | 116.5 |
| World      | 145.1 |
| Algeria    | 149.8 |
| Bahrain    | 150.5 |
| Morocco    | 155.5 |
| Egypt      | 157.2 |
| Qatar      | 158.3 |
| Palestine  | 163.6 |
| UAE        | 177.6 |
| Jordan     | 178.4 |
| Syria      | 191.3 |
| Kuwait     | 193.9 |
| Europe     | 239.9 |
| Lebanon    | 274.2 |
| USA        | 282.3 |

70-85+

|            |       |
|------------|-------|
| Libya      | 48.7  |
| S.Arabia   | 69.4  |
| Oman       | 73.9  |
| Mauritania | 84.1  |
| Iraq       | 90.4  |
| Tunisia    | 94.2  |
| Algeria    | 108.4 |
| Morocco    | 116.2 |
| Somalia    | 118.8 |
| Qatar      | 140.5 |
| Sudan      | 148.1 |
| Bahrain    | 150.4 |
| World      | 182.7 |
| Jordan     | 183.7 |
| Egypt      | 200.6 |
| Syria      | 219.6 |
| UAE        | 234.2 |
| Kuwait     | 241.4 |
| Palestine  | 255.6 |
| Europe     | 293.9 |
| Lebanon    | 366.5 |
| USA        | 387.0 |

# Cervix uteri

|            | 15-34 |            | 35-54 |            | 55-69 |            | 70-85+ |
|------------|-------|------------|-------|------------|-------|------------|--------|
| Bahrain    |       | Egypt      | 3.7   | Palestine  | 5.5   | Bahrain    |        |
| Libya      | 0.14  | Iraq       | 4.1   | Iraq       | 5.9   | Iraq       | 4.4    |
| Iraq       | 0.29  | S.Arabia   | 4.9   | Egypt      | 7.5   | S.Arabia   | 9.5    |
| Jordan     | 0.29  | Palestine  | 5.4   | S.Arabia   | 8.3   | USA        | 11.2   |
| Egypt      | 0.30  | Jordan     | 5.6   | Jordan     | 8.6   | Kuwait     | 12.2   |
| Palestine  | 0.35  | Kuwait     | 6.3   | Syria      | 10.1  | Egypt      | 12.5   |
| S.Arabia   | 0.38  | Tunisia    | 6.4   | Kuwait     | 10.9  | Jordan     | 13.1   |
| Qatar      | 0.43  | Qatar      | 7.0   | USA        | 12.7  | Syria      | 14.0   |
| Algeria    | 0.44  | Bahrain    | 7.2   | Qatar      | 14.6  | Palestine  | 14.2   |
| UAE        | 0.46  | Syria      | 7.2   | Tunisia    | 15.2  | Qatar      | 15.2   |
| Tunisia    | 0.58  | UAE        | 9.0   | Lebanon    | 16.4  | Tunisia    | 16.1   |
| Syria      | 0.64  | Lebanon    | 11.9  | Bahrain    | 19.4  | Europe     | 17.2   |
| Kuwait     | 0.65  | Oman       | 13.1  | Oman       | 19.7  | Oman       | 19.1   |
| Sudan      | 0.84  | Algeria    | 13.5  | Europe     | 23.0  | Lebanon    | 22.5   |
| Lebanon    | 0.97  | USA        | 13.9  | UAE        | 24.5  | Sudan      | 27.2   |
| Oman       | 1.00  | Sudan      | 14.5  | Sudan      | 31.5  | World      | 29.8   |
| Morocco    | 2.10  | Libya      | 19.2  | Algeria    | 32.1  | Algeria    | 32.2   |
| World      | 4.50  | Europe     | 24.8  | World      | 35.6  | UAE        | 36.9   |
| USA        | 4.80  | World      | 28.5  | Libya      | 47.2  | Libya      | 46.4   |
| Mauritania | 4.90  | Morocco    | 30.4  | Morocco    | 62.6  | Somalia    | 64.9   |
| Somalia    | 4.90  | Somalia    | 48.0  | Somalia    | 80.1  | Morocco    | 66.0   |
| Europe     | 7.30  | Mauritania | 53.8  | Mauritania | 116.5 | Mauritania | 153.8  |

# Colorectum

**Females**

|            | 15-34 | 35-54      | 55-69 | 70-85+     |      |            |       |
|------------|-------|------------|-------|------------|------|------------|-------|
| Qatar      | 0.21  | Mauritania | 6.0   | Sudan      | 15.2 | Sudan      | 20.5  |
| Kuwait     | 0.63  | Iraq       | 6.5   | Iraq       | 19.9 | Somalia    | 25.3  |
| Mauritania | 0.64  | Sudan      | 8.2   | Egypt      | 21.0 | Iraq       | 33.0  |
| Bahrain    | 0.73  | Egypt      | 8.4   | Mauritania | 24.2 | Egypt      | 42.0  |
| Oman       | 0.77  | Qatar      | 9.8   | Somalia    | 30.2 | Morocco    | 48.5  |
| Iraq       | 0.80  | Kuwait     | 10.3  | Oman       | 34.7 | Libya      | 58.6  |
| UAE        | 0.85  | Tunisia    | 11.8  | S.Arabia   | 39.0 | S.Arabia   | 60.6  |
| Sudan      | 0.99  | Bahrain    | 12.1  | Morocco    | 41.0 | Mauritania | 62.0  |
| Morocco    | 1.00  | Somalia    | 12.6  | Tunisia    | 42.1 | Oman       | 63.6  |
| Palestine  | 1.00  | Oman       | 12.9  | Libya      | 42.7 | UAE        | 73.0  |
| Syria      | 1.00  | Morocco    | 13.1  | Bahrain    | 47.5 | Bahrain    | 73.1  |
| World      | 1.10  | World      | 14.0  | Algeria    | 50.7 | Algeria    | 76.0  |
| Jordan     | 1.10  | S.Arabia   | 15.4  | UAE        | 52.8 | Tunisia    | 78.0  |
| Lebanon    | 1.10  | Algeria    | 17.1  | Syria      | 53.0 | Syria      | 107.2 |
| S.Arabia   | 1.10  | Syria      | 17.9  | Palestine  | 60.5 | Kuwait     | 114.3 |
| Egypt      | 1.20  | UAE        | 19.5  | World      | 60.7 | Qatar      | 115.4 |
| Somalia    | 1.30  | Libya      | 20.8  | Kuwait     | 62.0 | Jordan     | 125.9 |
| Europe     | 1.40  | Palestine  | 20.8  | Qatar      | 62.6 | Palestine  | 137.8 |
| Algeria    | 1.50  | Europe     | 21.1  | Lebanon    | 63.7 | World      | 150.4 |
| Tunisia    | 1.60  | Lebanon    | 23.3  | Jordan     | 74.4 | Lebanon    | 162.0 |
| USA        | 2.10  | Jordan     | 24.6  | USA        | 80.9 | USA        | 176.0 |
| Libya      | 2.20  | USA        | 26.3  | Europe     | 96.6 | Europe     | 205.4 |

**Males**

|            | 15-34 | 35-54      | 55-69 | 70-85+     |       |            |       |
|------------|-------|------------|-------|------------|-------|------------|-------|
| Qatar      | 0.37  | Kuwait     | 5.6   | Mauritania | 19.3  | Mauritania | 32.4  |
| UAE        | 0.42  | Qatar      | 5.7   | Sudan      | 20.1  | Egypt      | 38.9  |
| Bahrain    | 0.46  | Bahrain    | 6.0   | Egypt      | 22.0  | Sudan      | 43.7  |
| Libya      | 0.54  | Mauritania | 6.3   | Iraq       | 27.6  | Iraq       | 45.7  |
| Jordan     | 0.67  | UAE        | 6.4   | Somalia    | 35.0  | Somalia    | 51.1  |
| Kuwait     | 0.72  | Sudan      | 7.9   | Oman       | 41.7  | Oman       | 63.4  |
| Palestine  | 0.98  | Iraq       | 8.5   | Qatar      | 44.7  | Morocco    | 77.7  |
| World      | 1.00  | Egypt      | 9.4   | Syria      | 49.5  | Libya      | 87.5  |
| Somalia    | 1.00  | Somalia    | 9.6   | Kuwait     | 52.9  | Tunisia    | 96.0  |
| Iraq       | 1.10  | Morocco    | 11.5  | Tunisia    | 53.6  | S.Arabia   | 102.1 |
| Tunisia    | 1.10  | Tunisia    | 12.7  | Morocco    | 54.5  | Algeria    | 112.9 |
| Algeria    | 1.20  | Libya      | 13.1  | Jordan     | 55.3  | Syria      | 125.0 |
| Mauritania | 1.20  | Jordan     | 14.0  | Libya      | 57.6  | Jordan     | 133.1 |
| S.Arabia   | 1.20  | Algeria    | 14.2  | Bahrain    | 59.3  | UAE        | 136.9 |
| Sudan      | 1.20  | Syria      | 14.9  | Algeria    | 60.7  | Kuwait     | 139.9 |
| Syria      | 1.20  | S.Arabia   | 16.2  | S.Arabia   | 61.3  | Bahrain    | 154.4 |
| Europe     | 1.30  | World      | 16.6  | Lebanon    | 66.7  | Qatar      | 178.2 |
| Morocco    | 1.30  | Oman       | 17.6  | UAE        | 69.9  | Lebanon    | 194.8 |
| Egypt      | 1.60  | Palestine  | 18.8  | Palestine  | 77.3  | Palestine  | 200.2 |
| Oman       | 1.60  | Lebanon    | 22.6  | World      | 94.9  | World      | 224.2 |
| Lebanon    | 1.70  | Europe     | 23.0  | USA        | 110.9 | USA        | 226.0 |
| USA        | 1.70  | USA        | 30.4  | Europe     | 161.6 | Europe     | 349.5 |

# Corpus uteri

25-39

|            |      |
|------------|------|
| Libya      |      |
| UAE        |      |
| Morocco    | 0.10 |
| Mauritania | 0.22 |
| Egypt      | 0.38 |
| Qatar      | 0.39 |
| Iraq       | 0.43 |
| Tunisia    | 0.43 |
| Algeria    | 0.44 |
| Sudan      | 0.55 |
| Bahrain    | 0.56 |
| Jordan     | 0.62 |
| Somalia    | 0.67 |
| Kuwait     | 0.72 |
| Palestine  | 0.79 |
| Oman       | 0.96 |
| Syria      | 0.98 |
| S.Arabia   | 1.10 |
| Europe     | 1.70 |
| World      | 1.70 |
| Lebanon    | 1.80 |
| USA        | 2.80 |

40-54

|            |      |
|------------|------|
| Libya      | 1.4  |
| Mauritania | 2.9  |
| Sudan      | 2.9  |
| Iraq       | 3.0  |
| Somalia    | 3.2  |
| Oman       | 3.2  |
| Algeria    | 3.8  |
| Morocco    | 4.3  |
| Tunisia    | 5.0  |
| Egypt      | 5.7  |
| Qatar      | 6.4  |
| S.Arabia   | 7.6  |
| Palestine  | 8.6  |
| Kuwait     | 8.8  |
| Jordan     | 9.8  |
| Syria      | 9.8  |
| UAE        | 10.3 |
| Bahrain    | 12.6 |
| World      | 14.2 |
| Lebanon    | 15.9 |
| Europe     | 23.5 |
| USA        | 30.0 |

55-69

|            |       |
|------------|-------|
| Libya      | 9.1   |
| Iraq       | 9.1   |
| Mauritania | 11.3  |
| Algeria    | 11.3  |
| Sudan      | 12.0  |
| Somalia    | 13.7  |
| Tunisia    | 15.2  |
| Morocco    | 19.7  |
| Oman       | 21.2  |
| Qatar      | 21.3  |
| Egypt      | 23.2  |
| Bahrain    | 27.2  |
| Syria      | 28.9  |
| Palestine  | 31.0  |
| Jordan     | 36.0  |
| World      | 36.7  |
| Lebanon    | 41.3  |
| Kuwait     | 53.7  |
| S.Arabia   | 54.7  |
| Europe     | 75.9  |
| USA        | 96.6  |
| UAE        | 116.7 |

70-85+

|            |       |
|------------|-------|
| Iraq       | 5.3   |
| Bahrain    | 6.5   |
| Algeria    | 7.9   |
| Sudan      | 11.0  |
| Tunisia    | 13.6  |
| Mauritania | 14.0  |
| Qatar      | 15.2  |
| Morocco    | 15.4  |
| Oman       | 17.7  |
| Somalia    | 18.3  |
| Libya      | 18.8  |
| Egypt      | 28.1  |
| Syria      | 36.0  |
| World      | 39.6  |
| Lebanon    | 50.7  |
| Palestine  | 51.9  |
| Jordan     | 52.9  |
| UAE        | 67.6  |
| Kuwait     | 70.2  |
| Europe     | 78.8  |
| USA        | 94.3  |
| S.Arabia   | 119.0 |

# Gallbladder

## Females

|            | 30-54 |            | 55-69 |            | 70-85+ |
|------------|-------|------------|-------|------------|--------|
| Mauritania | 0.22  | Egypt      | 3.4   | Egypt      | 5.5    |
| Qatar      | 0.53  | Oman       | 3.4   | Mauritania | 7.7    |
| UAE        | 0.67  | Mauritania | 3.9   | Somalia    | 7.7    |
| Europe     | 0.75  | Sudan      | 4.8   | Sudan      | 8.6    |
| Kuwait     | 0.75  | S.Arabia   | 5.2   | Oman       | 10.4   |
| Iraq       | 0.86  | Jordan     | 5.8   | Morocco    | 10.5   |
| Egypt      | 0.91  | Palestine  | 6.1   | Bahrain    | 11.4   |
| S.Arabia   | 0.91  | USA        | 6.5   | S.Arabia   | 11.6   |
| Sudan      | 0.91  | Europe     | 6.6   | Iraq       | 16.8   |
| USA        | 0.93  | Lebanon    | 6.9   | USA        | 16.9   |
| Bahrain    | 1.20  | Somalia    | 7.2   | Europe     | 19.0   |
| Morocco    | 1.30  | Syria      | 7.4   | Palestine  | 19.8   |
| Oman       | 1.30  | Bahrain    | 8.0   | Kuwait     | 19.8   |
| Syria      | 1.40  | Morocco    | 8.0   | Lebanon    | 20.8   |
| Lebanon    | 1.50  | Kuwait     | 8.5   | World      | 23.3   |
| Palestine  | 1.50  | World      | 8.6   | Syria      | 24.8   |
| World      | 1.60  | Tunisia    | 8.6   | Tunisia    | 25.7   |
| Tunisia    | 1.60  | Iraq       | 9.0   | Qatar      | 28.0   |
| Somalia    | 1.80  | Libya      | 10.5  | Algeria    | 29.3   |
| Jordan     | 1.90  | Qatar      | 12.2  | Jordan     | 35.3   |
| Libya      | 2.30  | UAE        | 16.2  | Libya      | 44.1   |
| Algeria    | 3.40  | Algeria    | 20.8  | UAE        | 46.3   |

## Males

|            | 30-54 |            | 55-69 |            | 70-85+ |
|------------|-------|------------|-------|------------|--------|
| Mauritania |       | Mauritania |       | Mauritania |        |
| Sudan      | 0.20  | Sudan      | 1.7   | Sudan      | 3.7    |
| Qatar      | 0.27  | Somalia    | 2.5   | Morocco    | 6.6    |
| UAE        | 0.36  | Egypt      | 3.4   | Somalia    | 6.7    |
| Bahrain    | 0.37  | Morocco    | 4.2   | Iraq       | 6.9    |
| Somalia    | 0.50  | Iraq       | 4.4   | Egypt      | 9.6    |
| Oman       | 0.52  | S.Arabia   | 4.6   | Bahrain    | 9.6    |
| Kuwait     | 0.58  | Qatar      | 4.9   | Lebanon    | 12.1   |
| Palestine  | 0.58  | Bahrain    | 5.9   | S.Arabia   | 13.0   |
| Libya      | 0.63  | Kuwait     | 6.1   | Tunisia    | 15.3   |
| Morocco    | 0.68  | Syria      | 6.3   | Libya      | 15.7   |
| S.Arabia   | 0.68  | UAE        | 6.6   | Syria      | 16.0   |
| Iraq       | 0.70  | Libya      | 6.7   | Algeria    | 17.2   |
| Tunisia    | 0.79  | Palestine  | 6.8   | USA        | 18.2   |
| Egypt      | 0.80  | Lebanon    | 7.0   | Kuwait     | 21.3   |
| Europe     | 0.80  | USA        | 7.0   | Palestine  | 22.1   |
| Syria      | 0.93  | Jordan     | 7.2   | Europe     | 22.4   |
| World      | 1.00  | Tunisia    | 7.4   | World      | 24.8   |
| Lebanon    | 1.00  | Europe     | 7.6   | Jordan     | 27.9   |
| USA        | 1.00  | World      | 8.2   | Oman       | 28.6   |
| Jordan     | 1.20  | Algeria    | 8.9   | Qatar      | 33.5   |
| Algeria    | 1.40  | Oman       | 14.2  | UAE        | 54.7   |



# Hodgkin Lymphoma

Females

|                 | 0-14 | 15-34           | 35-54           | 55-69          | 70-85+        |
|-----------------|------|-----------------|-----------------|----------------|---------------|
| Bahrain         |      | Mauritania 0.13 | Bahrain         | Mauritania     | Mauritania    |
| Mauritania 0.11 |      | Sudan 0.39      | Qatar           | Qatar          | Qatar         |
| Egypt 0.24      |      | Somalia 0.48    | Mauritania 0.52 | Sudan 0.70     | Somalia       |
| World 0.26      |      | Bahrain 0.86    | World 0.85      | Somalia 0.83   | Libya         |
| Iraq 0.34       |      | Egypt 0.90      | Egypt 0.97      | World 1.20     | Bahrain       |
| UAE 0.35        |      | World 0.98      | Somalia 0.99    | Libya 1.60     | UAE           |
| Oman 0.39       |      | Oman 1.80       | Sudan 1.30      | Morocco 1.60   | Sudan 1.3     |
| Libya 0.41      |      | Iraq 1.90       | Kuwait 1.30     | Europe 1.90    | World 2.2     |
| Sudan 0.48      |      | Qatar 1.90      | S.Arabia 1.40   | Algeria 2.00   | Europe 2.4    |
| Qatar 0.53      |      | UAE 2.00        | UAE 1.50        | Kuwait 2.10    | Oman 3.2      |
| Syria 0.55      |      | Kuwait 2.10     | Jordan 1.50     | Tunisia 2.10   | USA 3.3       |
| Algeria 0.59    |      | S.Arabia 2.40   | Tunisia 1.50    | Egypt 2.30     | Iraq 3.4      |
| Morocco 0.61    |      | Morocco 2.50    | Morocco 1.80    | Jordan 2.30    | Algeria 3.5   |
| Palestine 0.61  |      | Jordan 2.70     | Palestine 2.10  | USA 2.40       | Tunisia 3.5   |
| USA 0.62        |      | Libya 2.70      | Iraq 2.20       | Iraq 2.70      | Kuwait 3.7    |
| Europe 0.63     |      | Syria 2.70      | Algeria 2.20    | S.Arabia 2.70  | S.Arabia 3.8  |
| Somalia 0.63    |      | Tunisia 2.70    | Europe 2.20     | Syria 2.80     | Jordan 4.7    |
| Kuwait 0.68     |      | Algeria 2.80    | USA 2.40        | Palestine 3.00 | Syria 4.8     |
| Jordan 0.72     |      | Palestine 2.90  | Libya 2.60      | Lebanon 3.10   | Morocco 6.5   |
| Lebanon 0.75    |      | USA 3.50        | Syria 2.60      | Oman 4.50      | Lebanon 7.4   |
| Tunisia 0.79    |      | Europe 3.60     | Oman 2.80       | Bahrain 6.50   | Palestine 8.4 |
| S.Arabia 0.81   |      | Lebanon 4.20    | Lebanon 4.00    | UAE 8.00       | Egypt 8.8     |

Males

|                 | 0-14 | 15-34           | 35-54           | 55-69           | 70-85+         |
|-----------------|------|-----------------|-----------------|-----------------|----------------|
| Mauritania 0.32 |      | Mauritania 0.63 | UAE 0.27        | Mauritania 0.63 | Qatar          |
| World 0.52      |      | Sudan 0.90      | Mauritania 0.41 | Palestine 0.63  | Mauritania     |
| Qatar 0.53      |      | Somalia 0.96    | Bahrain 0.68    | Libya 0.90      | Bahrain        |
| Sudan 0.55      |      | Bahrain 1.10    | Somalia 1.10    | Bahrain 1.10    | Somalia        |
| Bahrain 0.61    |      | World 1.10      | World 1.30      | Somalia 1.10    | UAE            |
| Somalia 0.65    |      | Libya 1.50      | Sudan 1.40      | World 2.00      | Jordan 1.7     |
| Libya 0.70      |      | UAE 1.50        | Qatar 1.50      | Sudan 2.30      | Sudan 2.3      |
| UAE 0.73        |      | Morocco 1.70    | Kuwait 1.60     | Jordan 2.40     | World 2.9      |
| USA 0.76        |      | Egypt 1.80      | Libya 2.00      | S.Arabia 2.40   | Algeria 3.1    |
| Oman 0.79       |      | Oman 1.80       | Algeria 2.10    | Kuwait 2.70     | Kuwait 3.5     |
| Kuwait 0.85     |      | Jordan 2.10     | Egypt 2.20      | Egypt 2.80      | Europe 3.5     |
| Palestine 0.87  |      | Iraq 2.20       | S.Arabia 2.30   | Algeria 3.00    | Tunisia 3.6    |
| Jordan 0.88     |      | S.Arabia 2.20   | Morocco 2.40    | Europe 3.10     | S.Arabia 4.0   |
| Europe 0.91     |      | Algeria 2.30    | Iraq 2.60       | Iraq 3.10       | Oman 4.1       |
| Morocco 0.91    |      | Tunisia 2.30    | Tunisia 3.00    | UAE 3.20        | USA 4.8        |
| S.Arabia 0.92   |      | Palestine 2.50  | Europe 3.00     | Qatar 3.50      | Iraq 5.1       |
| Tunisia 0.96    |      | Kuwait 2.90     | Palestine 3.10  | Morocco 3.60    | Morocco 6.2    |
| Iraq 1.00       |      | Syria 2.90      | Jordan 3.20     | USA 3.70        | Egypt 8.1      |
| Syria 1.00      |      | Qatar 3.20      | USA 3.50        | Syria 4.00      | Syria 8.2      |
| Algeria 1.10    |      | USA 3.60        | Syria 3.70      | Tunisia 4.10    | Libya 10.1     |
| Lebanon 1.50    |      | Europe 3.70     | Oman 4.30       | Oman 5.60       | Palestine 11.5 |
| Egypt 1.60      |      | Lebanon 4.40    | Lebanon 5.40    | Lebanon 5.70    | Lebanon 15.8   |

# Kidney

|         | 20-39      | 40-54  | 55-69      | 70-85+ |            |        |            |      |
|---------|------------|--------|------------|--------|------------|--------|------------|------|
| Females | Bahrain    |        | Kuwait     | 1.2    | Mauritania | 1.4    | Mauritania |      |
|         | Qatar      |        | Morocco    | 1.5    | Oman       | 3.3    | Bahrain    |      |
|         | Morocco    | 0.15   | Algeria    | 1.5    | Sudan      | 3.9    | Sudan      | 1.7  |
|         | Algeria    | 0.26   | Mauritania | 1.5    | Morocco    | 4.3    | Somalia    | 2.4  |
|         | Tunisia    | 0.32   | Bahrain    | 1.8    | Algeria    | 4.5    | Algeria    | 4.0  |
|         | UAE        | 0.32   | Egypt      | 2.1    | Somalia    | 4.6    | Oman       | 5.5  |
|         | Libya      | 0.38   | Sudan      | 2.4    | Egypt      | 5.3    | Morocco    | 6.5  |
|         | Iraq       | 0.39   | Libya      | 2.5    | Bahrain    | 5.6    | Iraq       | 6.8  |
|         | Somalia    | 0.39   | Iraq       | 2.6    | Tunisia    | 5.7    | Egypt      | 7.1  |
|         | Sudan      | 0.43   | Tunisia    | 2.7    | Iraq       | 5.8    | S.Arabia   | 9.2  |
|         | Kuwait     | 0.45   | UAE        | 2.9    | Libya      | 6.5    | Tunisia    | 10.1 |
|         | Jordan     | 0.46   | Somalia    | 2.9    | Kuwait     | 6.8    | Libya      | 10.6 |
|         | Mauritania | 0.46   | Syria      | 3.2    | Syria      | 7.0    | Syria      | 11.0 |
|         | Egypt      | 0.51   | Lebanon    | 3.2    | UAE        | 7.5    | Kuwait     | 11.8 |
|         | World      | 0.53   | Jordan     | 3.3    | Lebanon    | 7.6    | Lebanon    | 12.5 |
|         | S.Arabia   | 0.54   | Palestine  | 3.3    | Palestine  | 7.6    | Qatar      | 12.8 |
|         | Syria      | 0.54   | World      | 3.6    | S.Arabia   | 7.9    | Jordan     | 13.1 |
|         | Palestine  | 0.55   | Qatar      | 3.7    | Jordan     | 8.0    | Palestine  | 22.0 |
|         | Lebanon    | 0.79   | S.Arabia   | 3.8    | World      | 11.7   | World      | 22.0 |
|         | Oman       | 0.79   | Oman       | 3.9    | Qatar      | 12.2   | UAE        | 37.1 |
| Europe  | 0.96       | Europe | 8.4        | Europe | 26.2       | Europe | 38.6       |      |
| USA     | 1.70       | USA    | 11.2       | USA    | 29.8       | USA    | 43.8       |      |

|        | 20-39      | 40-54  | 55-69      | 70-85+ |            |        |            |      |
|--------|------------|--------|------------|--------|------------|--------|------------|------|
| Males  | UAE        | 0.10   | UAE        | 0.74   | Mauritania | 3.3    | Mauritania |      |
|        | Somalia    | 0.11   | Mauritania | 1.20   | Somalia    | 4.1    | Sudan      | 4.4  |
|        | Qatar      | 0.15   | Somalia    | 1.50   | Sudan      | 4.9    | Somalia    | 5.0  |
|        | Bahrain    | 0.17   | Algeria    | 1.80   | Algeria    | 6.0    | Bahrain    | 8.0  |
|        | Morocco    | 0.18   | Qatar      | 1.90   | Morocco    | 7.0    | Oman       | 8.1  |
|        | Sudan      | 0.22   | Sudan      | 2.20   | Oman       | 7.5    | Algeria    | 11.6 |
|        | Kuwait     | 0.23   | Morocco    | 2.40   | Bahrain    | 8.0    | Iraq       | 12.0 |
|        | Algeria    | 0.28   | Kuwait     | 2.70   | Qatar      | 8.5    | Morocco    | 14.5 |
|        | Mauritania | 0.29   | Tunisia    | 3.10   | Tunisia    | 8.8    | Tunisia    | 18.5 |
|        | Libya      | 0.30   | Bahrain    | 3.60   | Iraq       | 9.2    | Egypt      | 19.3 |
|        | Tunisia    | 0.34   | Oman       | 4.00   | Kuwait     | 9.9    | S.Arabia   | 20.9 |
|        | Egypt      | 0.46   | Egypt      | 4.10   | Egypt      | 11.0   | Syria      | 22.0 |
|        | Iraq       | 0.50   | Iraq       | 4.50   | S.Arabia   | 12.1   | Qatar      | 22.1 |
|        | Jordan     | 0.67   | Libya      | 4.60   | Jordan     | 13.5   | Kuwait     | 23.3 |
|        | S.Arabia   | 0.67   | S.Arabia   | 4.80   | Palestine  | 13.9   | Jordan     | 23.6 |
|        | World      | 0.71   | Jordan     | 5.80   | Libya      | 14.1   | Lebanon    | 29.7 |
|        | Oman       | 0.73   | Palestine  | 7.00   | UAE        | 14.5   | UAE        | 36.8 |
|        | Syria      | 0.98   | World      | 7.20   | Syria      | 14.6   | World      | 42.6 |
|        | Palestine  | 1.10   | Syria      | 7.20   | Lebanon    | 22.0   | Libya      | 44.2 |
|        | Lebanon    | 1.30   | Lebanon    | 11.40  | World      | 24.0   | Palestine  | 48.6 |
| Europe | 1.80       | Europe | 18.70      | Europe | 55.3       | Europe | 80.0       |      |
| USA    | 2.40       | USA    | 20.70      | USA    | 58.7       | USA    | 85.9       |      |

# Larynx

## Females

|            | 30-54 | 55-69           | 70-85+         |
|------------|-------|-----------------|----------------|
| Qatar      |       | Qatar           | Qatar          |
| Bahrain    |       | Bahrain         | Bahrain        |
| Kuwait     |       | Sudan           | UAE            |
| Mauritania |       | S.Arabia 0.82   | Mauritania     |
| UAE        |       | Oman 0.98       | Somalia 0.83   |
| Sudan      | 0.05  | Jordan 1.10     | S.Arabia 0.99  |
| S.Arabia   | 0.10  | Algeria 1.20    | Tunisia 1.90   |
| Morocco    | 0.18  | Egypt 1.20      | Egypt 2.00     |
| Oman       | 0.20  | Tunisia 1.20    | Algeria 2.30   |
| Algeria    | 0.30  | Palestine 1.50  | Europe 2.70    |
| Somalia    | 0.34  | Morocco 1.60    | World 2.90     |
| Egypt      | 0.36  | Somalia 1.70    | Oman 3.20      |
| Libya      | 0.38  | UAE 2.00        | Libya 3.30     |
| Tunisia    | 0.39  | World 2.10      | Jordan 3.60    |
| World      | 0.40  | Mauritania 2.20 | Morocco 3.60   |
| Palestine  | 0.43  | Kuwait 2.40     | Sudan 3.80     |
| Europe     | 0.62  | Europe 3.00     | Iraq 4.00      |
| Jordan     | 0.69  | Libya 3.60      | Syria 5.40     |
| Iraq       | 0.87  | Syria 3.90      | USA 5.50       |
| USA        | 0.99  | Lebanon 4.10    | Palestine 6.80 |
| Syria      | 1.20  | USA 4.80        | Lebanon 7.70   |
| Lebanon    | 2.30  | Iraq 6.20       | Kuwait 8.10    |

## Males

|            | 30-54 | 55-69          | 70-85+         |
|------------|-------|----------------|----------------|
| UAE        | 0.33  | S.Arabia 4.5   | S.Arabia 7.3   |
| S.Arabia   | 0.63  | Bahrain 4.5    | Oman 8.1       |
| Kuwait     | 0.67  | Somalia 5.3    | Mauritania 8.2 |
| Somalia    | 0.73  | Mauritania 6.7 | Somalia 10.3   |
| Qatar      | 0.87  | Oman 6.7       | Qatar 10.7     |
| Bahrain    | 0.91  | Kuwait 7.2     | UAE 11.2       |
| Mauritania | 1.20  | Qatar 7.8      | Sudan 13.5     |
| Egypt      | 1.40  | Sudan 8.0      | Kuwait 15.4    |
| Sudan      | 1.70  | UAE 8.5        | Egypt 23.4     |
| Iraq       | 1.90  | Egypt 9.9      | World 23.5     |
| Oman       | 2.10  | World 17.2     | Jordan 26.0    |
| Algeria    | 2.70  | Algeria 19.2   | Europe 27.8    |
| World      | 2.70  | Palestine 20.2 | USA 30.1       |
| Libya      | 3.10  | Jordan 20.2    | Algeria 30.6   |
| Tunisia    | 3.30  | Iraq 20.7      | Iraq 31.9      |
| USA        | 3.30  | USA 21.1       | Morocco 34.7   |
| Europe     | 4.40  | Syria 23.3     | Bahrain 35.0   |
| Morocco    | 4.60  | Libya 25.1     | Syria 36.2     |
| Syria      | 4.60  | Tunisia 26.1   | Tunisia 43.2   |
| Palestine  | 5.00  | Morocco 28.4   | Lebanon 49.1   |
| Jordan     | 5.80  | Europe 28.6    | Palestine 53.4 |
| Lebanon    | 5.80  | Lebanon 30.1   | Libya 53.6     |

# Leukaemia

| Females   | 0-14       |           | 15-34      |           | 35-54      |           | 55-69      |           | 70-85+     |  |
|-----------|------------|-----------|------------|-----------|------------|-----------|------------|-----------|------------|--|
|           | Mauritania | 0.22      | Mauritania | 0.12      | Mauritania | 1.0       | Mauritania | 3.0       | Mauritania |  |
| Morocco   | 1.40       | Bahrain   | 0.97       | Oman      | 2.7        | Tunisia   | 5.6        | Oman      | 8.7        |  |
| Somalia   | 1.70       | UAE       | 1.10       | Qatar     | 2.8        | Morocco   | 6.6        | Algeria   | 9.8        |  |
| Sudan     | 1.90       | Morocco   | 1.30       | Morocco   | 3.0        | Oman      | 6.7        | Morocco   | 13.5       |  |
| Bahrain   | 2.10       | Lebanon   | 1.50       | Bahrain   | 3.1        | Algeria   | 7.3        | Iraq      | 15.1       |  |
| Algeria   | 2.40       | Tunisia   | 1.70       | Tunisia   | 3.1        | Qatar     | 9.0        | Qatar     | 15.2       |  |
| Egypt     | 2.40       | Jordan    | 1.70       | Algeria   | 3.3        | Bahrain   | 9.5        | Libya     | 15.2       |  |
| Jordan    | 2.60       | Kuwait    | 1.70       | Kuwait    | 3.6        | Iraq      | 9.8        | S.Arabia  | 15.4       |  |
| Palestine | 2.60       | Somalia   | 1.80       | World     | 3.9        | World     | 10.1       | UAE       | 15.7       |  |
| World     | 2.90       | Egypt     | 1.80       | UAE       | 4.0        | S.Arabia  | 10.3       | Kuwait    | 15.9       |  |
| Qatar     | 2.90       | World     | 1.80       | Palestine | 4.1        | Palestine | 11.1       | Tunisia   | 16.9       |  |
| Tunisia   | 3.10       | Syria     | 1.80       | Jordan    | 4.7        | Egypt     | 12.0       | Egypt     | 17.9       |  |
| Syria     | 3.40       | Europe    | 1.80       | Egypt     | 4.7        | Lebanon   | 12.3       | Sudan     | 19.7       |  |
| Oman      | 3.50       | Qatar     | 1.90       | Europe    | 4.7        | Syria     | 12.9       | World     | 21.2       |  |
| Libya     | 3.60       | Sudan     | 2.00       | Libya     | 4.7        | Kuwait    | 13.4       | Syria     | 25.3       |  |
| Iraq      | 3.70       | Palestine | 2.00       | S.Arabia  | 4.9        | Sudan     | 13.8       | Lebanon   | 26.4       |  |
| Lebanon   | 4.10       | Tunisia   | 2.00       | Iraq      | 5.0        | Somalia   | 15.2       | Bahrain   | 26.7       |  |
| UAE       | 4.30       | Iraq      | 2.10       | Syria     | 5.1        | Europe    | 15.4       | Somalia   | 26.9       |  |
| Europe    | 4.60       | Oman      | 2.40       | Sudan     | 5.7        | UAE       | 15.7       | Europe    | 32.2       |  |
| S.Arabia  | 4.70       | S.Arabia  | 2.40       | Lebanon   | 6.1        | Jordan    | 16.1       | Jordan    | 34.2       |  |
| Kuwait    | 5.60       | USA       | 2.60       | Somalia   | 6.3        | Libya     | 17.2       | USA       | 42.8       |  |
| USA       | 5.70       | Libya     | 2.90       | USA       | 6.6        | USA       | 20.7       | Palestine | 60.0       |  |

| Males     | 0-14       |           | 15-34      |            | 35-54 |           | 55-69      |           | 70-85+     |     |
|-----------|------------|-----------|------------|------------|-------|-----------|------------|-----------|------------|-----|
|           | Mauritania | 0.54      | Mauritania | 0.37       | UAE   | 0.84      | Mauritania | 2.5       | Mauritania | 2.9 |
| Sudan     | 2.40       | Jordan    | 1.50       | Mauritania | 0.99  | Morocco   | 7.5        | UAE       | 12.1       |     |
| Jordan    | 2.50       | Sudan     | 1.80       | Bahrain    | 2.80  | UAE       | 10.0       | Somalia   | 17.8       |     |
| Somalia   | 2.80       | Libya     | 1.80       | Morocco    | 3.00  | Tunisia   | 10.2       | Tunisia   | 17.9       |     |
| Morocco   | 2.90       | Kuwait    | 1.80       | Kuwait     | 3.20  | Algeria   | 10.6       | Oman      | 20.5       |     |
| Libya     | 3.00       | UAE       | 1.80       | Libya      | 3.30  | S.Arabia  | 11.5       | Egypt     | 21.0       |     |
| Tunisia   | 3.20       | Morocco   | 2.00       | Algeria    | 3.40  | Bahrain   | 11.9       | Qatar     | 22.1       |     |
| Egypt     | 3.30       | Algeria   | 2.00       | S.Arabia   | 3.80  | Palestine | 12.3       | Algeria   | 23.0       |     |
| Algeria   | 3.50       | Qatar     | 2.00       | Jordan     | 3.90  | Qatar     | 13.1       | S.Arabia  | 24.8       |     |
| Palestine | 3.50       | Palestine | 2.20       | Qatar      | 4.00  | Oman      | 13.1       | Morocco   | 27.2       |     |
| World     | 3.80       | Oman      | 2.20       | World      | 4.60  | Somalia   | 13.5       | Iraq      | 32.3       |     |
| Iraq      | 3.80       | Europe    | 2.20       | Tunisia    | 4.80  | Egypt     | 13.8       | Sudan     | 34.2       |     |
| Syria     | 3.80       | Bahrain   | 2.30       | Syria      | 4.90  | Kuwait    | 14.8       | World     | 36.5       |     |
| Qatar     | 4.20       | Egypt     | 2.40       | Egypt      | 5.00  | Iraq      | 14.8       | Lebanon   | 37.9       |     |
| Oman      | 4.80       | World     | 2.40       | Iraq       | 5.20  | World     | 15.2       | Bahrain   | 39.9       |     |
| Kuwait    | 5.10       | Syria     | 2.40       | Somalia    | 5.30  | Libya     | 16.1       | Libya     | 47.6       |     |
| S.Arabia  | 5.10       | Somalia   | 2.50       | Palestine  | 5.50  | Lebanon   | 17.9       | Kuwait    | 52.1       |     |
| Lebanon   | 5.20       | Tunisia   | 2.60       | Europe     | 6.00  | Syria     | 20.8       | Syria     | 60.2       |     |
| Europe    | 5.30       | Iraq      | 2.60       | Oman       | 6.30  | Sudan     | 24.3       | Europe    | 60.6       |     |
| USA       | 5.80       | Lebanon   | 2.60       | Lebanon    | 7.20  | Europe    | 26.1       | USA       | 78.2       |     |
| Bahrain   | 6.10       | S.Arabia  | 2.70       | Sudan      | 8.90  | Jordan    | 26.8       | Jordan    | 112.6      |     |
| UAE       | 9.10       | USA       | 3.20       | USA        | 9.10  | USA       | 34.7       | Palestine | 138.4      |     |

# Lip & Oral

|                | 20-39      | 40-54  | 55-69      | 70-85+ |
|----------------|------------|--------|------------|--------|
| <b>Females</b> | Qatar      |        | UAE        | 1.5    |
|                | Bahrain    |        | Algeria    | 1.6    |
|                | Libya      |        | Tunisia    | 3.3    |
|                | UAE        | 0.06   | Morocco    | 3.5    |
|                | Oman       | 0.12   | Bahrain    | 0.98   |
|                | Palestine  | 0.15   | Qatar      | 1.10   |
|                | Algeria    | 0.20   | Iraq       | 1.10   |
|                | Iraq       | 0.21   | Jordan     | 1.10   |
|                | Morocco    | 0.21   | Syria      | 1.30   |
|                | Kuwait     | 0.22   | Kuwait     | 1.50   |
|                | Mauritania | 0.30   | Tunisia    | 1.60   |
|                | S.Arabia   | 0.31   | Egypt      | 1.60   |
|                | Syria      | 0.31   | S.Arabia   | 1.90   |
|                | Jordan     | 0.32   | Lebanon    | 1.90   |
|                | Tunisia    | 0.32   | Sudan      | 2.00   |
|                | Lebanon    | 0.34   | Libya      | 2.20   |
|                | Somalia    | 0.38   | Mauritania | 2.20   |
|                | Egypt      | 0.40   | Somalia    | 2.40   |
|                | Europe     | 0.44   | World      | 3.40   |
|                | Sudan      | 0.47   | USA        | 3.50   |
| World          | 0.64       | Europe | 3.60       |        |
| USA            | 0.66       | Oman   | 4.00       |        |
|                |            |        | UAE        |        |
|                |            |        | Bahrain    |        |
|                |            |        | Algeria    | 3.4    |
|                |            |        | Jordan     | 5.5    |
|                |            |        | Oman       | 5.8    |
|                |            |        | Syria      | 6.9    |
|                |            |        | Libya      | 8.1    |
|                |            |        | Mauritania | 8.4    |
|                |            |        | Sudan      | 9.4    |
|                |            |        | Lebanon    | 10.9   |
|                |            |        | S.Arabia   | 11.1   |
|                |            |        | Tunisia    | 11.3   |
|                |            |        | Morocco    | 11.5   |
|                |            |        | Somalia    | 12.3   |
|                |            |        | Egypt      | 12.9   |
|                |            |        | World      | 14.3   |
|                |            |        | Europe     | 14.4   |
|                |            |        | Europe     | 14.9   |
|                |            |        | Palestine  | 16.1   |
|                |            |        | USA        | 16.3   |
|                |            |        | USA        | 24.4   |
|                |            |        | Qatar      | 28.0   |

|              | 20-39      | 40-54  | 55-69      | 70-85+ |
|--------------|------------|--------|------------|--------|
| <b>Males</b> | UAE        | 0.02   | UAE        | 0.26   |
|              | Libya      | 0.10   | Iraq       | 0.68   |
|              | Tunisia    | 0.24   | Algeria    | 1.30   |
|              | Morocco    | 0.25   | Libya      | 1.40   |
|              | Iraq       | 0.27   | S.Arabia   | 1.40   |
|              | Bahrain    | 0.29   | Bahrain    | 1.60   |
|              | Lebanon    | 0.31   | Syria      | 1.80   |
|              | Algeria    | 0.32   | Mauritania | 1.90   |
|              | Egypt      | 0.32   | Kuwait     | 1.90   |
|              | Qatar      | 0.32   | Qatar      | 2.20   |
|              | S.Arabia   | 0.32   | Lebanon    | 2.30   |
|              | Syria      | 0.32   | Palestine  | 2.40   |
|              | Jordan     | 0.37   | Tunisia    | 2.60   |
|              | Sudan      | 0.37   | Egypt      | 2.60   |
|              | Somalia    | 0.38   | Jordan     | 2.60   |
|              | Palestine  | 0.40   | Morocco    | 3.10   |
|              | Mauritania | 0.44   | Somalia    | 3.10   |
|              | Kuwait     | 0.45   | Sudan      | 3.80   |
|              | Oman       | 0.49   | Oman       | 4.50   |
|              | Europe     | 0.77   | USA        | 9.10   |
| USA          | 0.79       | World  | 9.60       |        |
| World        | 2.10       | Europe | 10.90      |        |
|              |            |        | UAE        | 2.6    |
|              |            |        | Algeria    | 3.3    |
|              |            |        | Mauritania | 3.3    |
|              |            |        | Palestine  | 4.7    |
|              |            |        | Lebanon    | 4.9    |
|              |            |        | Libya      | 5.4    |
|              |            |        | Jordan     | 5.5    |
|              |            |        | Syria      | 5.8    |
|              |            |        | S.Arabia   | 6.0    |
|              |            |        | Iraq       | 6.6    |
|              |            |        | Kuwait     | 6.8    |
|              |            |        | Tunisia    | 7.5    |
|              |            |        | Qatar      | 7.7    |
|              |            |        | Egypt      | 7.7    |
|              |            |        | Somalia    | 9.2    |
|              |            |        | Sudan      | 9.3    |
|              |            |        | Morocco    | 9.7    |
|              |            |        | Oman       | 11.5   |
|              |            |        | Bahrain    | 12.4   |
|              |            |        | World      | 21.8   |
|              |            |        | USA        | 28.9   |
|              |            |        | Europe     | 30.9   |
|              |            |        | Bahrain    |        |
|              |            |        | UAE        | 4.0    |
|              |            |        | Oman       | 4.0    |
|              |            |        | Algeria    | 6.1    |
|              |            |        | Libya      | 8.6    |
|              |            |        | Iraq       | 9.6    |
|              |            |        | Somalia    | 10.8   |
|              |            |        | Syria      | 11.4   |
|              |            |        | Jordan     | 12.1   |
|              |            |        | S.Arabia   | 12.8   |
|              |            |        | Lebanon    | 13.0   |
|              |            |        | Sudan      | 13.3   |
|              |            |        | Egypt      | 13.4   |
|              |            |        | Morocco    | 13.9   |
|              |            |        | Mauritania | 14.6   |
|              |            |        | Qatar      | 15.5   |
|              |            |        | Tunisia    | 18.7   |
|              |            |        | Kuwait     | 18.9   |
|              |            |        | Palestine  | 24.2   |
|              |            |        | World      | 28.8   |
|              |            |        | Europe     | 32.4   |
|              |            |        | USA        | 34.2   |

# Liver

## Females

|            | 30-54 | 55-69           | 70-85+          |
|------------|-------|-----------------|-----------------|
| Palestine  | 0.22  | Morocco 4.1     | Qatar           |
| Morocco    | 0.46  | Palestine 4.9   | Algeria 8.1     |
| Bahrain    | 0.58  | Algeria 5.5     | Morocco 8.9     |
| Qatar      | 0.63  | Jordan 8.4      | Somalia 11.6    |
| Algeria    | 1.00  | Tunisia 8.8     | Tunisia 14.3    |
| Kuwait     | 1.10  | Syria 9.2       | Palestine 15.5  |
| Iraq       | 1.30  | Iraq 9.8        | Oman 15.9       |
| Jordan     | 1.30  | Europe 9.8      | Sudan 18.4      |
| S.Arabia   | 1.40  | Lebanon 10.1    | Iraq 21.5       |
| Europe     | 1.50  | S.Arabia 10.6   | S.Arabia 21.8   |
| Syria      | 1.50  | Sudan 10.7      | USA 23.0        |
| UAE        | 1.50  | Oman 11.2       | Lebanon 23.7    |
| Libya      | 1.70  | UAE 13.0        | Bahrain 24.4    |
| Lebanon    | 1.90  | Bahrain 14.5    | Europe 26.3     |
| USA        | 2.40  | Qatar 14.6      | Syria 27.1      |
| Oman       | 2.70  | USA 14.9        | Mauritania 27.3 |
| Sudan      | 2.90  | Somalia 14.9    | Jordan 33.5     |
| Tunisia    | 3.30  | Libya 15.1      | Kuwait 36.0     |
| World      | 3.70  | Kuwait 16.6     | Libya 38.9      |
| Somalia    | 3.70  | World 19.1      | World 41.5      |
| Mauritania | 9.80  | Mauritania 21.9 | UAE 58.2        |
| Egypt      | 10.90 | Egypt 74.7      | Egypt 128.6     |

## Males

|            | 30-54 | 55-69           | 70-85+          |
|------------|-------|-----------------|-----------------|
| UAE        | 0.30  | Morocco 5.2     | Morocco 13.8    |
| Morocco    | 0.66  | Algeria 6.8     | Tunisia 14.5    |
| Algeria    | 0.71  | Palestine 8.3   | Algeria 14.6    |
| Iraq       | 1.10  | Tunisia 9.7     | Somalia 22.2    |
| S.Arabia   | 1.10  | UAE 12.3        | Palestine 24.3  |
| Jordan     | 1.60  | Jordan 13.0     | Sudan 24.6      |
| Syria      | 1.60  | Somalia 13.2    | Iraq 28.5       |
| Palestine  | 1.70  | Iraq 14.1       | Syria 32.9      |
| Qatar      | 1.70  | Syria 14.3      | Lebanon 32.9    |
| Bahrain    | 1.80  | Lebanon 14.6    | Jordan 35.7     |
| Kuwait     | 1.90  | Bahrain 16.0    | Bahrain 39.9    |
| Lebanon    | 2.40  | Libya 17.1      | Libya 40.0      |
| Tunisia    | 2.70  | Sudan 19.0      | Oman 40.9       |
| Libya      | 2.80  | Qatar 19.3      | USA 54.0        |
| Somalia    | 4.10  | S.Arabia 22.1   | Europe 66.2     |
| Oman       | 4.20  | Kuwait 24.0     | UAE 69.9        |
| Europe     | 4.90  | Oman 25.4       | Kuwait 75.8     |
| Sudan      | 5.50  | Europe 34.6     | Qatar 78.4      |
| USA        | 9.10  | USA 48.6        | S.Arabia 83.1   |
| World      | 13.80 | World 55.4      | World 90.4      |
| Mauritania | 18.70 | Mauritania 63.6 | Mauritania 94.3 |
| Egypt      | 45.70 | Egypt 216.7     | Egypt 295.5     |

# Lung

## Females

|            | 20-54 | 55-69      | 70-85+ |            |       |
|------------|-------|------------|--------|------------|-------|
| Mauritania | 0.70  | Mauritania | 5.9    | Mauritania | 7.7   |
| S.Arabia   | 0.82  | Sudan      | 6.5    | Oman       | 7.8   |
| UAE        | 0.96  | Oman       | 6.7    | Sudan      | 8.3   |
| Qatar      | 1.00  | Tunisia    | 9.7    | Tunisia    | 14.0  |
| Oman       | 1.10  | S.Arabia   | 11.0   | Algeria    | 18.6  |
| Libya      | 1.40  | Qatar      | 12.2   | Libya      | 19.0  |
| Sudan      | 1.40  | Algeria    | 12.7   | Somalia    | 19.5  |
| Kuwait     | 1.50  | Somalia    | 13.0   | Morocco    | 21.6  |
| Algeria    | 1.60  | Libya      | 14.1   | S.Arabia   | 23.5  |
| Somalia    | 1.90  | Morocco    | 14.6   | Egypt      | 32.3  |
| Tunisia    | 2.00  | Egypt      | 15.8   | Iraq       | 36.8  |
| Bahrain    | 2.20  | Palestine  | 18.9   | UAE        | 41.9  |
| Iraq       | 2.20  | Kuwait     | 19.0   | Palestine  | 45.9  |
| Morocco    | 2.20  | Bahrain    | 20.8   | Jordan     | 53.5  |
| Palestine  | 2.40  | Iraq       | 22.7   | Kuwait     | 62.4  |
| Jordan     | 2.50  | Jordan     | 24.3   | Syria      | 66.2  |
| Egypt      | 2.60  | UAE        | 26.7   | Bahrain    | 84.7  |
| Syria      | 4.50  | Syria      | 35.3   | Qatar      | 100.2 |
| World      | 5.40  | Lebanon    | 59.3   | Lebanon    | 107.5 |
| Europe     | 8.00  | World      | 61.1   | Europe     | 129.8 |
| Lebanon    | 8.80  | Europe     | 86.2   | World      | 134.6 |
| USA        | 10.50 | USA        | 132.9  | USA        | 286.7 |

## Males

|            | 20-54 | 55-69      | 70-85+ |            |       |
|------------|-------|------------|--------|------------|-------|
| UAE        | 0.38  | Sudan      | 11.9   | Sudan      | 19.5  |
| Kuwait     | 0.89  | Somalia    | 15.8   | Somalia    | 27.2  |
| Qatar      | 1.10  | Mauritania | 16.2   | Mauritania | 33.7  |
| Bahrain    | 1.40  | S.Arabia   | 19.7   | Oman       | 51.1  |
| S.Arabia   | 1.50  | Qatar      | 33.7   | UAE        | 68.5  |
| Mauritania | 1.70  | Kuwait     | 34.5   | S.Arabia   | 72.8  |
| Sudan      | 1.80  | Oman       | 36.3   | Egypt      | 95.6  |
| Somalia    | 1.90  | UAE        | 36.4   | Algeria    | 109.5 |
| Oman       | 2.30  | Bahrain    | 42.0   | Kuwait     | 112.1 |
| Iraq       | 5.20  | Egypt      | 47.7   | Iraq       | 127.8 |
| Egypt      | 5.30  | Algeria    | 87.6   | Qatar      | 151.2 |
| Algeria    | 7.30  | Iraq       | 90.6   | Tunisia    | 165.3 |
| Palestine  | 9.00  | Jordan     | 106.5  | Morocco    | 166.2 |
| World      | 9.50  | Palestine  | 107.4  | Libya      | 217.8 |
| Syria      | 9.80  | Syria      | 111.9  | Syria      | 247.0 |
| USA        | 10.40 | Libya      | 116.7  | Lebanon    | 256.8 |
| Libya      | 10.70 | Tunisia    | 117.2  | Palestine  | 271.1 |
| Jordan     | 12.20 | Lebanon    | 134.5  | Bahrain    | 277.1 |
| Europe     | 13.20 | World      | 137.8  | World      | 301.7 |
| Lebanon    | 13.80 | Morocco    | 157.4  | Europe     | 364.3 |
| Tunisia    | 15.40 | USA        | 172.3  | Jordan     | 368.4 |
| Morocco    | 17.60 | Europe     | 215.7  | USA        | 412.7 |

# Melanoma

## Females

|            | 20-54 | 55-69      | 70-85+  |       |
|------------|-------|------------|---------|-------|
| Qatar      |       | Qatar      | Qatar   |       |
| Bahrain    |       | Bahrain    | Bahrain |       |
| S.Arabia   | 0.17  | UAE        | UAE     |       |
| Egypt      | 0.19  | S.Arabia   | 0.94    |       |
| Libya      | 0.24  | Oman       | 0.98    |       |
| Kuwait     | 0.27  | Tunisia    | 1.20    |       |
| Jordan     | 0.30  | Egypt      | 1.40    |       |
| Morocco    | 0.31  | Kuwait     | 1.50    |       |
| Sudan      | 0.32  | Sudan      | 1.60    |       |
| Somalia    | 0.35  | Jordan     | 1.80    |       |
| Iraq       | 0.38  | Algeria    | 1.80    |       |
| Mauritania | 0.41  | Iraq       | 1.90    |       |
| Algeria    | 0.44  | Libya      | 2.30    |       |
| UAE        | 0.48  | Syria      | 2.50    |       |
| Tunisia    | 0.50  | Morocco    | 2.90    |       |
| Palestine  | 0.61  | Somalia    | 3.00    |       |
| Oman       | 0.65  | Palestine  | 3.20    |       |
| Syria      | 0.65  | Lebanon    | 4.10    |       |
| Lebanon    | 1.20  | Mauritania | 4.70    |       |
| World      | 2.50  | World      | 9.20    |       |
| USA        | 11.80 | Europe     | 28.90   |       |
| Europe     | 14.00 | USA        | 33.10   |       |
|            |       |            | World   | 17.70 |
|            |       |            | Europe  | 39.40 |
|            |       |            | USA     | 48.20 |

## Males

|            | 20-54 | 55-69      | 70-85+ |        |
|------------|-------|------------|--------|--------|
| Mauritania |       | Qatar      | Qatar  |        |
| Libya      |       | S.Arabia   | 0.44   |        |
| Bahrain    |       | Egypt      | 0.81   |        |
| UAE        | 0.02  | Libya      | 1.10   |        |
| S.Arabia   | 0.02  | Jordan     | 1.10   |        |
| Egypt      | 0.03  | Bahrain    | 1.50   |        |
| Morocco    | 0.10  | Palestine  | 1.50   |        |
| Sudan      | 0.11  | Iraq       | 1.60   |        |
| Qatar      | 0.11  | Kuwait     | 1.60   |        |
| Iraq       | 0.12  | Mauritania | 1.80   |        |
| Oman       | 0.13  | Tunisia    | 1.90   |        |
| Jordan     | 0.15  | Somalia    | 2.00   |        |
| Algeria    | 0.16  | Algeria    | 2.10   |        |
| Tunisia    | 0.17  | UAE        | 2.20   |        |
| Somalia    | 0.18  | Morocco    | 2.40   |        |
| Kuwait     | 0.21  | Sudan      | 2.70   |        |
| Syria      | 0.22  | Oman       | 3.10   |        |
| World      | 0.34  | Syria      | 3.10   |        |
| Palestine  | 0.36  | Lebanon    | 6.20   |        |
| Lebanon    | 0.39  | World      | 12.20  |        |
| USA        | 0.89  | Europe     | 37.40  |        |
| Europe     | 1.40  | USA        | 55.50  |        |
|            |       |            | World  | 30.80  |
|            |       |            | Europe | 67.60  |
|            |       |            | USA    | 123.60 |



# Mesothelioma

## Females

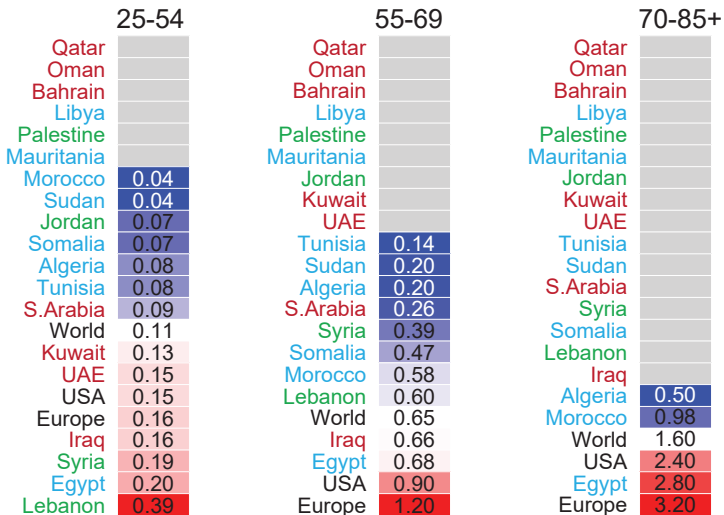

## Males

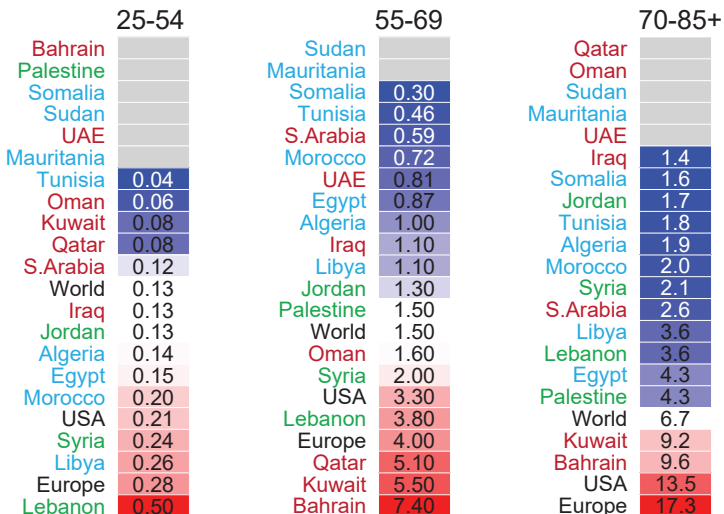

# Multiple Myeloma

## Females

|            | 20-54 | 55-69          | 70-85+         |
|------------|-------|----------------|----------------|
| Qatar      |       | S.Arabia 4.8   | Qatar          |
| Mauritania |       | Morocco 5.1    | Mauritania     |
| UAE        | 0.28  | Jordan 5.2     | Sudan 1.7      |
| Iraq       | 0.30  | Palestine 5.3  | Somalia 3.0    |
| Sudan      | 0.49  | Oman 5.7       | Egypt 4.0      |
| Egypt      | 0.50  | Sudan 5.9      | Morocco 4.0    |
| S.Arabia   | 0.51  | Tunisia 6.6    | Iraq 4.1       |
| Algeria    | 0.53  | Somalia 7.3    | Oman 5.5       |
| Kuwait     | 0.56  | Mauritania 7.5 | Libya 6.6      |
| World      | 0.57  | Algeria 7.8    | Tunisia 6.7    |
| Tunisia    | 0.58  | Bahrain 8.0    | S.Arabia 7.3   |
| Morocco    | 0.68  | World 8.7      | Bahrain 7.4    |
| Libya      | 0.74  | Kuwait 9.3     | Syria 11.4     |
| Oman       | 0.77  | Libya 10.0     | Kuwait 12.2    |
| Somalia    | 0.85  | Qatar 12.2     | World 12.7     |
| Europe     | 0.89  | UAE 14.6       | Jordan 12.8    |
| Syria      | 0.94  | Iraq 16.3      | Algeria 13.8   |
| Bahrain    | 1.10  | Europe 17.0    | Lebanon 18.6   |
| Jordan     | 1.20  | Syria 19.2     | Europe 20.9    |
| Lebanon    | 1.30  | USA 20.6       | USA 29.1       |
| Palestine  | 1.30  | Egypt 24.0     | Palestine 31.1 |
| USA        | 1.40  | Lebanon 37.0   | UAE 34.9       |

## Males

|            | 20-54 | 55-69           | 70-85          |
|------------|-------|-----------------|----------------|
| Mauritania | 0.15  | Mauritania 0.97 | Mauritania     |
| UAE        | 0.18  | UAE 3.30        | Sudan 3.2      |
| Bahrain    | 0.24  | S.Arabia 4.70   | Egypt 3.3      |
| Libya      | 0.28  | Qatar 5.00      | Iraq 6.9       |
| S.Arabia   | 0.52  | Iraq 5.00       | Bahrain 8.0    |
| Somalia    | 0.56  | Tunisia 5.10    | Somalia 8.3    |
| Qatar      | 0.60  | Bahrain 5.40    | Tunisia 9.2    |
| Tunisia    | 0.60  | Egypt 6.00      | Kuwait 9.2     |
| Kuwait     | 0.64  | Morocco 6.20    | S.Arabia 9.6   |
| Iraq       | 0.73  | Kuwait 7.20     | Qatar 10.7     |
| World      | 0.76  | Somalia 7.50    | UAE 11.9       |
| Morocco    | 0.80  | Algeria 7.50    | Oman 12.3      |
| Algeria    | 0.84  | Libya 8.00      | Algeria 13.8   |
| Egypt      | 1.20  | Oman 8.20       | Morocco 13.9   |
| Oman       | 1.20  | World 8.30      | Syria 14.3     |
| Sudan      | 1.30  | Syria 8.60      | Libya 15.9     |
| Europe     | 1.40  | Sudan 9.70      | Jordan 17.0    |
| Syria      | 1.40  | Lebanon 9.90    | Lebanon 19.6   |
| Jordan     | 1.80  | Jordan 10.20    | World 20.1     |
| Lebanon    | 1.80  | Palestine 11.50 | Europe 35.3    |
| USA        | 1.90  | Europe 14.20    | Palestine 42.3 |
| Palestine  | 2.30  | USA 20.60       | USA 46.5       |

# Nasopharynx

## Females

|            | 20-39 | 40-69          | 70-85+         |
|------------|-------|----------------|----------------|
| Qatar      |       | Qatar          | Qatar          |
| Mauritania |       | Mauritania     | Mauritania     |
| UAE        |       | UAE 0.20       | UAE            |
| Bahrain    |       | Europe 0.50    | Oman           |
| Kuwait     |       | Egypt 0.52     | Europe 0.60    |
| Egypt      | 0.14  | USA 0.54       | Egypt 0.93     |
| Europe     | 0.14  | Oman 0.57      | USA 0.95       |
| USA        | 0.14  | Bahrain 0.62   | Iraq 0.97      |
| Oman       | 0.15  | Palestine 0.65 | Syria 1.40     |
| Palestine  | 0.24  | Iraq 0.66      | Jordan 1.50    |
| Lebanon    | 0.28  | Kuwait 1.10    | S.Arabia 1.60  |
| Syria      | 0.31  | Syria 1.10     | Lebanon 1.70   |
| Iraq       | 0.35  | Jordan 1.10    | World 2.10     |
| Jordan     | 0.38  | S.Arabia 1.40  | Libya 2.50     |
| S.Arabia   | 0.38  | Lebanon 1.50   | Somalia 3.20   |
| World      | 0.53  | World 2.00     | Morocco 3.20   |
| Somalia    | 0.71  | Somalia 2.60   | Tunisia 3.30   |
| Sudan      | 0.94  | Sudan 2.80     | Kuwait 4.10    |
| Libya      | 0.96  | Tunisia 3.10   | Sudan 4.20     |
| Tunisia    | 1.10  | Morocco 3.40   | Palestine 4.60 |
| Algeria    | 1.20  | Libya 3.50     | Algeria 5.80   |
| Morocco    | 1.20  | Algeria 4.30   | Bahrain 11.40  |

## Males

|            | 20-39 | 40-69             | 70-85+        |
|------------|-------|-------------------|---------------|
| Qatar      |       | UAE 0.56          | Qatar         |
| UAE        |       | Bahrain 1.00      | Oman          |
| Kuwait     | 0.07  | Mauritania 1.00   | UAE           |
| Egypt      | 0.14  | Egypt 1.50        | Bahrain       |
| Oman       | 0.23  | USA 1.60          | Mauritania    |
| USA        | 0.28  | Europe 1.70       | Europe 1.9    |
| Bahrain    | 0.29  | Qatar 1.80        | USA 2.1       |
| Europe     | 0.34  | Oman 2.40         | Lebanon 2.8   |
| Iraq       | 0.36  | Lebanon 2.40      | Somalia 3.3   |
| Lebanon    | 0.39  | Iraq 2.70         | Iraq 3.4      |
| Mauritania | 0.45  | Kuwait 2.90       | Palestine 4.3 |
| Syria      | 0.48  | Syria 3.10        | Syria 4.5     |
| Libya      | 0.61  | Palestine 3.10    | S.Arabia 4.9  |
| Sudan      | 0.63  | Jordan 3.90       | Sudan 5.1     |
| Palestine  | 0.64  | Saudi Arabia 4.10 | Egypt 5.6     |
| S.Arabia   | 0.67  | Sudan 5.40        | World 5.9     |
| Jordan     | 0.69  | Somalia 5.50      | Morocco 6.0   |
| World      | 1.10  | World 5.80        | Jordan 6.1    |
| Somalia    | 1.30  | Libya 7.10        | Kuwait 7.1    |
| Morocco    | 1.50  | Tunisia 7.40      | Libya 9.5     |
| Tunisia    | 1.70  | Morocco 7.80      | Tunisia 11.6  |
| Algeria    | 2.80  | Algeria 11.30     | Algeria 13.5  |

# non-Hodgkin's Lymphoma

| Females    | 0-14 |            | 10-24 |            | 25-39 |           | 40-69      |           | 70-85+     |     |
|------------|------|------------|-------|------------|-------|-----------|------------|-----------|------------|-----|
|            | UAE  |            | UAE   | 0.19       | UAE   | 0.87      | Mauritania | 3.3       | Mauritania | 9.4 |
| S.Arabia   | 0.41 | Egypt      | 0.44  | Mauritania | 1.10  | Algeria   | 6.6        | Somalia   | 9.8        |     |
| Kuwait     | 0.45 | Sudan      | 0.62  | Bahrain    | 1.10  | Tunisia   | 7.5        | Iraq      | 18.0       |     |
| Jordan     | 0.46 | Iraq       | 0.64  | Libya      | 1.40  | Sudan     | 8.2        | Algeria   | 21.0       |     |
| Morocco    | 0.51 | Libya      | 0.74  | S.Arabia   | 1.50  | S.Arabia  | 8.9        | Tunisia   | 23.6       |     |
| Sudan      | 0.51 | Oman       | 0.75  | Morocco    | 1.50  | Libya     | 9.0        | Sudan     | 24.7       |     |
| Oman       | 0.59 | S.Arabia   | 0.76  | Kuwait     | 1.70  | Morocco   | 9.1        | S.Arabia  | 26.0       |     |
| Qatar      | 0.59 | Jordan     | 0.76  | Iraq       | 1.80  | Somalia   | 9.1        | Libya     | 26.1       |     |
| World      | 0.62 | Kuwait     | 0.84  | Oman       | 1.80  | Iraq      | 9.4        | Qatar     | 28.0       |     |
| Palestine  | 0.62 | World      | 0.84  | Tunisia    | 1.90  | Qatar     | 9.5        | Oman      | 30.1       |     |
| Algeria    | 0.63 | Morocco    | 0.87  | Qatar      | 1.90  | World     | 9.6        | World     | 32.6       |     |
| Somalia    | 0.63 | Palestine  | 0.99  | Sudan      | 2.00  | Bahrain   | 10.4       | Jordan    | 33.0       |     |
| Syria      | 0.67 | Mauritania | 0.99  | World      | 2.00  | Palestine | 12.0       | Morocco   | 36.4       |     |
| Tunisia    | 0.67 | Somalia    | 1.00  | Algeria    | 2.40  | Jordan    | 12.5       | Europe    | 41.3       |     |
| Europe     | 0.70 | Syria      | 1.00  | Jordan     | 2.50  | UAE       | 12.8       | UAE       | 41.9       |     |
| Bahrain    | 0.73 | USA        | 1.00  | Palestine  | 2.90  | Oman      | 14.1       | Bahrain   | 48.0       |     |
| Iraq       | 0.78 | Algeria    | 1.10  | Europe     | 2.90  | Europe    | 14.1       | Kuwait    | 50.2       |     |
| USA        | 0.81 | Tunisia    | 1.10  | Egypt      | 3.30  | Kuwait    | 14.5       | Syria     | 50.9       |     |
| Lebanon    | 0.84 | Europe     | 1.20  | Syria      | 3.50  | Syria     | 14.6       | USA       | 75.5       |     |
| Mauritania | 0.89 | Qatar      | 1.40  | USA        | 3.50  | Lebanon   | 22.2       | Palestine | 79.2       |     |
| Egypt      | 0.96 | Bahrain    | 1.60  | Somalia    | 4.10  | USA       | 22.7       | Egypt     | 82.8       |     |
| Libya      | 1.20 | Lebanon    | 2.00  | Lebanon    | 6.10  | Egypt     | 23.0       | Lebanon   | 98.8       |     |

| Males      | 0-14 |            | 10-24 |            | 25-39 |           | 40-69      |            | 70-85+  |      |
|------------|------|------------|-------|------------|-------|-----------|------------|------------|---------|------|
|            | Oman | 0.39       | Qatar | 0.14       | UAE   | 0.19      | Mauritania | 4.9        | Algeria | 19.3 |
| Jordan     | 0.67 | UAE        | 0.38  | Bahrain    | 0.82  | UAE       | 6.7        | Libya      | 20.5    |      |
| Bahrain    | 0.70 | Somalia    | 0.80  | Qatar      | 1.40  | Kuwait    | 9.9        | Somalia    | 23.1    |      |
| UAE        | 0.75 | Oman       | 0.84  | Mauritania | 1.50  | Qatar     | 10.2       | Iraq       | 23.2    |      |
| Palestine  | 0.79 | Jordan     | 0.95  | Kuwait     | 2.20  | Algeria   | 10.3       | Mauritania | 27.9    |      |
| Libya      | 0.83 | Sudan      | 1.00  | Libya      | 2.30  | S.Arabia  | 10.5       | Tunisia    | 30.0    |      |
| Syria      | 0.88 | Palestine  | 1.10  | Iraq       | 2.30  | Libya     | 11.7       | Oman       | 34.7    |      |
| Mauritania | 0.97 | Libya      | 1.10  | World      | 2.50  | Iraq      | 11.7       | S.Arabia   | 36.8    |      |
| Lebanon    | 0.98 | Syria      | 1.10  | Tunisia    | 2.60  | Tunisia   | 12.5       | Qatar      | 39.3    |      |
| S.Arabia   | 0.99 | Tunisia    | 1.10  | S.Arabia   | 2.60  | Bahrain   | 12.7       | Jordan     | 39.4    |      |
| Qatar      | 1.00 | Bahrain    | 1.20  | Algeria    | 2.60  | World     | 13.3       | Morocco    | 44.3    |      |
| World      | 1.10 | S.Arabia   | 1.20  | Morocco    | 3.10  | Somalia   | 13.5       | World      | 47.3    |      |
| Europe     | 1.30 | World      | 1.20  | Oman       | 3.30  | Palestine | 13.6       | Egypt      | 52.5    |      |
| USA        | 1.30 | Algeria    | 1.20  | Jordan     | 3.30  | Morocco   | 14.9       | Sudan      | 53.5    |      |
| Algeria    | 1.40 | Kuwait     | 1.20  | Palestine  | 3.40  | Jordan    | 14.9       | UAE        | 56.7    |      |
| Kuwait     | 1.50 | Iraq       | 1.20  | Somalia    | 3.50  | Sudan     | 16.6       | Syria      | 59.1    |      |
| Tunisia    | 1.50 | Egypt      | 1.20  | Sudan      | 3.70  | Oman      | 17.5       | Europe     | 66.1    |      |
| Morocco    | 1.60 | Mauritania | 1.30  | Europe     | 4.00  | Syria     | 18.3       | Bahrain    | 70.1    |      |
| Iraq       | 1.70 | Europe     | 1.60  | Syria      | 4.20  | Europe    | 20.4       | Kuwait     | 76.1    |      |
| Somalia    | 1.70 | USA        | 1.60  | Egypt      | 5.40  | Lebanon   | 28.3       | Palestine  | 99.9    |      |
| Sudan      | 1.80 | Morocco    | 1.70  | USA        | 5.60  | Egypt     | 30.5       | USA        | 108.9   |      |
| Egypt      | 2.00 | Lebanon    | 2.00  | Lebanon    | 6.90  | USA       | 31.3       | Lebanon    | 112.6   |      |

# Oesophagus

## Females

|            | 20-39 | 40-54           | 55-69          | 70-85+         |
|------------|-------|-----------------|----------------|----------------|
| Qatar      |       | Qatar           | Qatar          | Libya 2.6      |
| Lebanon    |       | Kuwait          | Libya          | Palestine 3.8  |
| Palestine  |       | Libya 0.27      | Lebanon 1.9    | Algeria 4.5    |
| UAE        |       | UAE 0.38        | Tunisia 2.0    | Tunisia 4.6    |
| Bahrain    |       | UAE 0.57        | Palestine 2.3  | Lebanon 5.3    |
| USA        | 0.06  | Iraq 0.62       | Algeria 2.3    | Syria 5.4      |
| Europe     | 0.07  | Jordan 0.73     | Syria 2.5      | Jordan 5.5     |
| Libya      | 0.08  | Palestine 0.74  | Kuwait 2.6     | Iraq 6.0       |
| Syria      | 0.11  | Syria 0.74      | Jordan 2.8     | Bahrain 7.4    |
| Egypt      | 0.12  | S.Arabia 0.78   | Morocco 3.2    | Mauritania 7.7 |
| Iraq       | 0.13  | Egypt 0.81      | Iraq 3.3       | Morocco 8.5    |
| Oman       | 0.15  | Lebanon 0.87    | S.Arabia 3.4   | USA 10.7       |
| S.Arabia   | 0.16  | Algeria 0.94    | Egypt 3.8      | Europe 11.2    |
| Tunisia    | 0.18  | Bahrain 0.98    | Mauritania 4.5 | Egypt 11.7     |
| Jordan     | 0.19  | USA 1.10        | UAE 4.7        | S.Arabia 12.6  |
| Morocco    | 0.23  | Tunisia 1.10    | USA 4.7        | UAE 15.5       |
| Kuwait     | 0.24  | Europe 1.20     | Europe 5.4     | Oman 15.9      |
| Mauritania | 0.30  | Oman 1.20       | Bahrain 6.4    | Kuwait 23.4    |
| World      | 0.31  | Morocco 1.30    | Oman 6.7       | World 29.0     |
| Somalia    | 0.40  | Mauritania 1.50 | World 15.5     | Sudan 41.8     |
| Algeria    | 0.43  | World 3.30      | Sudan 22.1     | Somalia 44.0   |
| Sudan      | 0.58  | Sudan 4.30      | Somalia 35.6   | Qatar 61.3     |
|            |       | Somalia 8.90    |                |                |

## Males

|            | 20-39 | 40-54           | 55-69          | 70-85+         |
|------------|-------|-----------------|----------------|----------------|
| Qatar      |       | Bahrain         | Bahrain 2.6    | Palestine 4.3  |
| Bahrain    |       | UAE 0.33        | Lebanon 2.6    | Mauritania 5.3 |
| UAE        |       | Iraq 0.50       | Algeria 3.0    | Oman 6.1       |
| Kuwait     | 0.08  | Qatar 0.51      | Qatar 3.3      | Lebanon 8.0    |
| Oman       | 0.11  | Libya 0.56      | Tunisia 3.5    | Algeria 8.0    |
| Jordan     | 0.13  | Palestine 0.67  | Syria 3.9      | Syria 8.7      |
| S.Arabia   | 0.14  | Kuwait 0.69     | S.Arabia 4.0   | Tunisia 8.8    |
| Iraq       | 0.15  | Algeria 0.71    | Oman 4.0       | Iraq 9.3       |
| Libya      | 0.15  | S.Arabia 0.80   | UAE 4.1        | Jordan 11.7    |
| Palestine  | 0.15  | Tunisia 0.92    | Iraq 4.2       | Morocco 13.2   |
| Syria      | 0.15  | Syria 0.97      | Kuwait 4.4     | Libya 14.3     |
| Morocco    | 0.16  | Jordan 1.10     | Mauritania 4.9 | Egypt 15.1     |
| Egypt      | 0.19  | Morocco 1.10    | Palestine 5.0  | S.Arabia 18.2  |
| Lebanon    | 0.19  | Egypt 1.20      | Jordan 5.1     | Qatar 22.1     |
| Tunisia    | 0.19  | Lebanon 1.20    | Morocco 6.1    | UAE 23.9       |
| Europe     | 0.21  | Oman 1.60       | Egypt 6.6      | Bahrain 25.5   |
| Algeria    | 0.23  | Mauritania 1.90 | Libya 6.7      | Kuwait 30.5    |
| USA        | 0.25  | USA 5.40        | Sudan 14.2     | Sudan 36.7     |
| Mauritania | 0.29  | Europe 6.50     | USA 25.7       | Europe 41.8    |
| World      | 0.48  | Sudan 7.40      | Europe 28.9    | USA 44.7       |
| Sudan      | 0.76  | World 9.70      | Somalia 32.4   | Somalia 49.4   |
| Somalia    | 0.85  | Somalia 11.70   | World 42.4     | World 71.7     |

# Oropharynx

## Females

|            | 30-54 | 55-69      | 70-85+     |      |
|------------|-------|------------|------------|------|
| Qatar      |       | Qatar      | Qatar      |      |
| Palestine  |       | Palestine  | Palestine  |      |
| Jordan     |       | Kuwait     | Kuwait     |      |
| Libya      |       | Bahrain    | Bahrain    |      |
| Tunisia    |       | Mauritania | Mauritania |      |
| Kuwait     |       | UAE        | UAE        |      |
| Bahrain    |       | S.Arabia   | Oman       |      |
| Mauritania |       | Sudan      | Libya      |      |
| Algeria    | 0.02  | Sudan      | 0.26       |      |
| UAE        | 0.06  | Tunisia    | 0.28       |      |
| S.Arabia   | 0.07  | Somalia    | 0.30       |      |
| Syria      | 0.09  | Algeria    | 0.31       |      |
| Iraq       | 0.10  | Jordan     | 0.37       |      |
| Egypt      | 0.11  | Iraq       | 0.42       |      |
| Morocco    | 0.13  | Egypt      | 0.52       |      |
| Somalia    | 0.14  | Syria      | 0.57       |      |
| Lebanon    | 0.24  | Morocco    | 0.60       |      |
| Oman       | 0.30  | Lebanon    | 0.65       |      |
| Sudan      | 0.32  | Oman       | 0.98       |      |
| World      | 0.41  | Libya      | 1.40       |      |
| USA        | 0.92  | World      | 1.70       |      |
| Europe     | 1.10  | USA        | 3.40       |      |
|            |       | Europe     | 4.40       |      |
|            |       |            | Sudan      | 4.00 |

## Males

|            | 30-54 | 55-69      | 70-85+     |
|------------|-------|------------|------------|
| Qatar      |       | UAE        | Qatar      |
| Palestine  |       | Sudan      | Mauritania |
| Bahrain    |       | S.Arabia   | Palestine  |
| Libya      |       | Kuwait     | UAE        |
| S.Arabia   | 0.04  | Qatar      | Sudan      |
| UAE        | 0.07  | Egypt      | Kuwait     |
| Jordan     | 0.09  | Mauritania | Bahrain    |
| Kuwait     | 0.10  | Jordan     | Libya      |
| Egypt      | 0.16  | Palestine  | S.Arabia   |
| Morocco    | 0.19  | Bahrain    | Somalia    |
| Sudan      | 0.19  | Algeria    | Iraq       |
| Mauritania | 0.23  | Somalia    | Egypt      |
| Algeria    | 0.25  | Iraq       | Syria      |
| Somalia    | 0.27  | Syria      | Jordan     |
| Iraq       | 0.28  | Libya      | Oman       |
| Syria      | 0.31  | Tunisia    | Lebanon    |
| Tunisia    | 0.33  | Oman       | Tunisia    |
| Lebanon    | 0.59  | Lebanon    | Algeria    |
| Oman       | 0.61  | Morocco    | Morocco    |
| World      | 1.80  | World      | World      |
| Europe     | 4.30  | Europe     | Europe     |
| USA        | 5.00  | USA        | USA        |

# Ovary

|            | 0-24 |            | 25-54 |            | 55-69 |            | 70-85+ |
|------------|------|------------|-------|------------|-------|------------|--------|
| Tunisia    | 0.22 | Oman       | 3.3   | Oman       | 11.2  | Iraq       | 8.5    |
| Mauritania | 0.25 | S.Arabia   | 3.4   | Tunisia    | 12.6  | Mauritania | 11.5   |
| Kuwait     | 0.31 | Kuwait     | 3.7   | Mauritania | 12.6  | Algeria    | 12.4   |
| Morocco    | 0.31 | Tunisia    | 4.2   | Iraq       | 12.7  | Oman       | 15.2   |
| Lebanon    | 0.32 | UAE        | 4.2   | Libya      | 13.2  | Morocco    | 16.1   |
| Syria      | 0.37 | Qatar      | 4.4   | S.Arabia   | 13.5  | Tunisia    | 16.9   |
| Jordan     | 0.38 | Palestine  | 4.8   | Palestine  | 16.1  | S.Arabia   | 18.1   |
| S.Arabia   | 0.38 | Mauritania | 4.9   | Algeria    | 16.6  | Jordan     | 23.6   |
| UAE        | 0.38 | Iraq       | 5.4   | Kuwait     | 17.8  | Syria      | 23.6   |
| Oman       | 0.39 | Libya      | 5.5   | Egypt      | 19.9  | World      | 26.8   |
| Palestine  | 0.40 | Jordan     | 5.6   | Jordan     | 20.9  | Libya      | 27.5   |
| Syria      | 0.40 | Bahrain    | 5.9   | Syria      | 21.5  | Kuwait     | 28.1   |
| Algeria    | 0.43 | Algeria    | 6.4   | World      | 21.6  | Egypt      | 28.7   |
| Egypt      | 0.43 | Morocco    | 6.5   | Morocco    | 22.0  | Somalia    | 28.8   |
| Sudan      | 0.43 | Egypt      | 7.0   | Qatar      | 23.3  | Sudan      | 29.4   |
| Iraq       | 0.44 | Syria      | 7.3   | Somalia    | 25.1  | Palestine  | 29.9   |
| Libya      | 0.46 | Sudan      | 7.5   | Sudan      | 25.5  | UAE        | 29.9   |
| Somalia    | 0.46 | World      | 7.8   | USA        | 31.2  | Lebanon    | 37.7   |
| World      | 0.48 | USA        | 8.1   | Lebanon    | 31.2  | Qatar      | 38.8   |
| USA        | 0.48 | Somalia    | 9.3   | UAE        | 32.9  | Europe     | 40.1   |
| Europe     | 0.54 | Lebanon    | 10.5  | Europe     | 33.7  | USA        | 45.9   |
| Qatar      | 0.77 | Europe     | 10.8  | Bahrain    | 34.4  | Bahrain    | 49.5   |
| Bahrain    | 0.84 |            |       |            |       |            |        |

# Pancreas

## Females

|            | 35-49 | 50-69          | 70-85+         |
|------------|-------|----------------|----------------|
| Qatar      |       | Sudan 3.1      | Mauritania 5.6 |
| UAE        |       | S.Arabia 5.3   | Sudan 7.5      |
| Oman       | 0.49  | Mauritania 5.4 | Somalia 9.7    |
| Tunisia    | 0.85  | Morocco 5.4    | Algeria 13.5   |
| S.Arabia   | 0.86  | Somalia 5.8    | Morocco 14.2   |
| Mauritania | 0.90  | Tunisia 6.1    | S.Arabia 14.9  |
| Bahrain    | 0.97  | Iraq 6.9       | Jordan 15.2    |
| Palestine  | 0.98  | Algeria 7.1    | Oman 15.9      |
| Kuwait     | 1.00  | Qatar 8.0      | Tunisia 16.5   |
| Algeria    | 1.10  | Palestine 8.6  | Iraq 18.2      |
| World      | 1.10  | Libya 8.6      | Syria 18.5     |
| Iraq       | 1.10  | Syria 9.1      | Bahrain 18.8   |
| Lebanon    | 1.20  | Egypt 9.2      | Egypt 21.3     |
| Morocco    | 1.20  | Oman 9.6       | Lebanon 21.4   |
| Sudan      | 1.30  | Jordan 9.6     | Palestine 40.6 |
| Syria      | 1.30  | Lebanon 10.7   | Libya 41.7     |
| Egypt      | 1.40  | World 11.5     | World 48.4     |
| Jordan     | 1.50  | Kuwait 13.1    | Kuwait 50.8    |
| Somalia    | 1.50  | Bahrain 13.8   | Qatar 61.3     |
| Libya      | 1.70  | Europe 20.2    | Europe 65.0    |
| Europe     | 2.20  | USA 21.0       | USA 67.7       |
| USA        | 2.50  | UAE 34.7       | UAE 114.4      |

## Males

|            | 35-49 | 50-69          | 70-85+          |
|------------|-------|----------------|-----------------|
| UAE        |       | Sudan 4.0      | Sudan 4.8       |
| Kuwait     | 0.55  | Somalia 5.1    | Somalia 11.1    |
| Qatar      | 0.61  | Qatar 6.2      | Mauritania 11.1 |
| Bahrain    | 0.76  | Mauritania 6.9 | Qatar 17.2      |
| Iraq       | 1.00  | UAE 7.6        | Morocco 17.9    |
| Sudan      | 1.00  | S.Arabia 9.1   | Tunisia 18.1    |
| Somalia    | 1.20  | Kuwait 9.3     | UAE 19.6        |
| Algeria    | 1.40  | Algeria 10.1   | S.Arabia 22.6   |
| Morocco    | 1.40  | Iraq 11.4      | Iraq 23.8       |
| Mauritania | 1.50  | Morocco 11.4   | Algeria 24.8    |
| S.Arabia   | 1.50  | Oman 12.8      | Oman 28.6       |
| Oman       | 1.80  | Tunisia 12.8   | Lebanon 32.0    |
| World      | 2.10  | Bahrain 13.5   | Syria 33.7      |
| Tunisia    | 2.50  | Palestine 14.1 | Egypt 34.3      |
| Palestine  | 2.80  | Syria 14.3     | Palestine 42.3  |
| Syria      | 3.00  | Lebanon 14.9   | Bahrain 44.5    |
| Egypt      | 3.30  | Jordan 16.2    | Jordan 45.9     |
| Jordan     | 3.30  | Libya 16.4     | Kuwait 46.5     |
| Libya      | 3.40  | Egypt 17.5     | Libya 53.2      |
| USA        | 3.50  | World 17.8     | World 57.0      |
| Europe     | 3.90  | USA 30.7       | Europe 83.8     |
| Lebanon    | 4.60  | Europe 32.7    | USA 84.0        |



# Prostate

25-39

|            |      |
|------------|------|
| Qatar      |      |
| Palestine  |      |
| Kuwait     |      |
| Bahrain    |      |
| Jordan     |      |
| Libya      |      |
| Mauritania |      |
| UAE        |      |
| S.Arabia   | 0.01 |
| Morocco    | 0.02 |
| Egypt      | 0.04 |
| Iraq       | 0.05 |
| Europe     | 0.08 |
| Sudan      | 0.08 |
| World      | 0.11 |
| Oman       | 0.15 |
| Syria      | 0.22 |
| Algeria    | 0.23 |
| Somalia    | 0.23 |
| USA        | 0.32 |
| Lebanon    | 0.54 |
| Tunisia    | 0.69 |

40-54

|            |       |
|------------|-------|
| UAE        | 0.65  |
| S.Arabia   | 0.71  |
| Kuwait     | 0.81  |
| Egypt      | 1.00  |
| Somalia    | 1.30  |
| Qatar      | 1.60  |
| Iraq       | 1.70  |
| Bahrain    | 1.80  |
| Algeria    | 1.80  |
| Sudan      | 1.90  |
| Jordan     | 2.30  |
| Libya      | 2.70  |
| Morocco    | 2.80  |
| Palestine  | 3.00  |
| Tunisia    | 3.00  |
| Mauritania | 3.10  |
| Oman       | 4.70  |
| Syria      | 5.40  |
| World      | 8.90  |
| Lebanon    | 14.70 |
| Europe     | 22.00 |
| USA        | 53.30 |

55-69

|            |       |
|------------|-------|
| S.Arabia   | 17.4  |
| Egypt      | 26.8  |
| Iraq       | 28.2  |
| Sudan      | 32.5  |
| Bahrain    | 34.8  |
| Tunisia    | 39.5  |
| Libya      | 44.7  |
| Algeria    | 45.1  |
| Somalia    | 47.0  |
| Jordan     | 50.6  |
| Qatar      | 53.6  |
| Oman       | 61.2  |
| Palestine  | 62.3  |
| UAE        | 65.4  |
| Kuwait     | 71.1  |
| Mauritania | 74.4  |
| Syria      | 75.3  |
| Morocco    | 89.9  |
| World      | 132.8 |
| Lebanon    | 144.3 |
| Europe     | 314.0 |
| USA        | 410.5 |

70-85+

|            |       |
|------------|-------|
| Iraq       | 80.5  |
| S.Arabia   | 100.8 |
| Oman       | 126.6 |
| Sudan      | 131.1 |
| Egypt      | 158.5 |
| Bahrain    | 165.8 |
| Tunisia    | 183.2 |
| Somalia    | 190.6 |
| Algeria    | 191.6 |
| UAE        | 211.2 |
| Jordan     | 219.9 |
| Qatar      | 234.0 |
| Libya      | 256.4 |
| Palestine  | 268.8 |
| Syria      | 272.4 |
| Morocco    | 308.4 |
| Mauritania | 328.6 |
| World      | 329.3 |
| Kuwait     | 341.5 |
| Lebanon    | 519.6 |
| USA        | 534.0 |
| Europe     | 595.8 |

# Salivary Glands

## Females

|            | 30-44 | 45-59 | 60-85+ |
|------------|-------|-------|--------|
| Qatar      |       |       |        |
| Bahrain    |       |       |        |
| UAE        |       |       |        |
| Morocco    | 0.05  |       |        |
| Kuwait     | 0.17  | 0.26  |        |
| Palestine  | 0.24  | 0.30  |        |
| Sudan      | 0.27  | 0.38  | 0.50   |
| Mauritania | 0.30  | 0.48  | 0.61   |
| Tunisia    | 0.30  | 0.50  | 0.77   |
| Jordan     | 0.32  | 0.51  | 0.83   |
| S.Arabia   | 0.34  | 0.54  | 0.94   |
| Algeria    | 0.40  | 0.61  | 1.10   |
| Egypt      | 0.40  | 0.62  | 1.10   |
| World      | 0.41  | 0.87  | 1.10   |
| Syria      | 0.43  | 0.90  | 1.20   |
| Europe     | 0.45  | 0.92  | 1.50   |
| Iraq       | 0.45  | 0.94  | 1.50   |
| Oman       | 0.56  | 0.99  | 1.70   |
| Somalia    | 0.56  | 1.00  | 1.90   |
| Libya      | 0.63  | 1.30  | 2.10   |
| USA        | 0.66  | 1.30  | 2.10   |
| Lebanon    | 0.69  | 1.60  | 2.60   |
|            |       |       | 2.70   |

## Males

|            | 30-44 | 45-59 | 60-85+ |
|------------|-------|-------|--------|
| Libya      |       |       |        |
| Mauritania |       |       |        |
| UAE        |       |       |        |
| Bahrain    |       |       |        |
| Kuwait     | 0.12  | 0.06  | 0.65   |
| Qatar      | 0.14  | 0.18  | 0.81   |
| Iraq       | 0.16  | 0.20  | 1.00   |
| Tunisia    | 0.16  | 0.39  | 1.20   |
| Algeria    | 0.22  | 0.43  | 1.30   |
| Egypt      | 0.22  | 0.50  | 1.50   |
| Sudan      | 0.22  | 0.54  | 1.80   |
| S.Arabia   | 0.23  | 0.54  | 2.00   |
| Somalia    | 0.24  | 0.61  | 2.00   |
| Oman       | 0.26  | 0.66  | 2.10   |
| Syria      | 0.27  | 0.88  | 2.40   |
| Morocco    | 0.30  | 0.89  | 2.70   |
| Lebanon    | 0.31  | 0.94  | 2.80   |
| Jordan     | 0.32  | 1.00  | 3.20   |
| World      | 0.41  | 1.00  | 3.40   |
| Europe     | 0.42  | 1.20  | 3.40   |
| Palestine  | 0.51  | 1.30  | 3.50   |
| USA        | 0.59  | 1.50  | 4.10   |
|            |       | 1.60  | 4.30   |
|            |       | 1.70  | 5.80   |

# Stomach

## Females

|            | 20-39 |            | 40-54 |            | 55-69 |            | 70-85+ |
|------------|-------|------------|-------|------------|-------|------------|--------|
| Libya      | 0.08  | S.Arabia   | 1.4   | S.Arabia   | 3.9   | Sudan      | 5.8    |
| Sudan      | 0.29  | Sudan      | 1.8   | Sudan      | 6.5   | Bahrain    | 6.5    |
| S.Arabia   | 0.32  | UAE        | 2.6   | Kuwait     | 7.0   | S.Arabia   | 10.0   |
| Somalia    | 0.38  | Qatar      | 2.6   | Egypt      | 8.2   | Morocco    | 15.6   |
| Mauritania | 0.46  | Kuwait     | 3.0   | USA        | 9.5   | Egypt      | 17.5   |
| UAE        | 0.49  | USA        | 3.4   | Bahrain    | 9.5   | Iraq       | 18.2   |
| Kuwait     | 0.51  | Iraq       | 4.1   | Iraq       | 9.7   | Libya      | 19.2   |
| Qatar      | 0.52  | Tunisia    | 4.1   | Tunisia    | 10.7  | Palestine  | 19.8   |
| USA        | 0.70  | Somalia    | 4.4   | Jordan     | 11.7  | Kuwait     | 20.3   |
| Oman       | 0.82  | Libya      | 4.5   | Morocco    | 12.4  | USA        | 24.5   |
| Egypt      | 0.91  | Egypt      | 4.5   | Libya      | 12.5  | Jordan     | 25.1   |
| Europe     | 0.92  | Bahrain    | 4.6   | Palestine  | 13.2  | Algeria    | 25.2   |
| Morocco    | 0.92  | Mauritania | 5.9   | Syria      | 14.4  | Somalia    | 27.0   |
| Iraq       | 0.96  | Europe     | 5.9   | Algeria    | 17.4  | Mauritania | 27.3   |
| Palestine  | 1.00  | Morocco    | 5.9   | Qatar      | 19.0  | Tunisia    | 27.4   |
| World      | 1.10  | Palestine  | 6.3   | Somalia    | 19.2  | Qatar      | 28.0   |
| Algeria    | 1.20  | Jordan     | 6.3   | Mauritania | 20.1  | Syria      | 30.6   |
| Jordan     | 1.30  | Oman       | 6.4   | Europe     | 20.7  | Oman       | 42.8   |
| Tunisia    | 1.40  | Algeria    | 6.4   | Lebanon    | 21.4  | Europe     | 46.7   |
| Syria      | 1.50  | Syria      | 7.4   | UAE        | 21.8  | Lebanon    | 47.7   |
| Bahrain    | 1.60  | World      | 8.0   | Oman       | 23.7  | World      | 60.8   |
| Lebanon    | 2.20  | Lebanon    | 12.0  | World      | 26.0  | UAE        | 63.2   |

## Males

|            | 20-39 |            | 40-54 |            | 55-69 |            | 70-85+ |
|------------|-------|------------|-------|------------|-------|------------|--------|
| UAE        | 0.11  | UAE        | 0.32  | S.Arabia   | 9.6   | Bahrain    | 17.6   |
| Bahrain    | 0.13  | Bahrain    | 1.10  | Sudan      | 10.6  | Egypt      | 22.6   |
| Qatar      | 0.15  | Kuwait     | 1.70  | Egypt      | 10.8  | Sudan      | 26.7   |
| Kuwait     | 0.16  | Qatar      | 1.80  | Kuwait     | 10.9  | S.Arabia   | 27.3   |
| Sudan      | 0.31  | S.Arabia   | 2.20  | UAE        | 13.9  | Morocco    | 31.1   |
| S.Arabia   | 0.32  | Sudan      | 4.20  | Qatar      | 14.3  | Kuwait     | 35.9   |
| Somalia    | 0.47  | Somalia    | 4.40  | Iraq       | 18.2  | Iraq       | 37.8   |
| Jordan     | 0.50  | Egypt      | 4.40  | Tunisia    | 19.0  | Somalia    | 41.1   |
| Egypt      | 0.63  | Libya      | 4.60  | Libya      | 19.1  | Libya      | 43.6   |
| Libya      | 0.63  | Iraq       | 5.30  | Somalia    | 20.6  | Tunisia    | 50.3   |
| Europe     | 0.69  | USA        | 5.70  | USA        | 22.0  | Palestine  | 50.8   |
| Iraq       | 0.69  | Oman       | 6.80  | Palestine  | 22.3  | USA        | 51.6   |
| USA        | 0.69  | Tunisia    | 7.00  | Bahrain    | 23.3  | Mauritania | 52.4   |
| Mauritania | 0.75  | Palestine  | 7.40  | Lebanon    | 24.4  | Algeria    | 53.9   |
| Syria      | 0.79  | Jordan     | 7.70  | Syria      | 26.6  | UAE        | 62.2   |
| Morocco    | 0.80  | Algeria    | 8.00  | Mauritania | 28.5  | Syria      | 63.1   |
| Palestine  | 0.82  | Mauritania | 8.20  | Algeria    | 29.7  | Jordan     | 73.4   |
| Algeria    | 0.92  | Syria      | 8.20  | Morocco    | 29.9  | Lebanon    | 76.1   |
| World      | 1.00  | Morocco    | 8.20  | Jordan     | 37.9  | Oman       | 87.8   |
| Oman       | 1.10  | Europe     | 10.60 | Europe     | 50.0  | Qatar      | 89.8   |
| Tunisia    | 1.10  | Lebanon    | 11.70 | Oman       | 53.4  | Europe     | 98.6   |
| Lebanon    | 1.60  | World      | 14.50 | World      | 66.0  | World      | 143.2  |

# Testis

10-24

|            |      |
|------------|------|
| Mauritania |      |
| Somalia    | 0.09 |
| Libya      | 0.11 |
| Sudan      | 0.17 |
| Oman       | 0.21 |
| Algeria    | 0.28 |
| Tunisia    | 0.28 |
| Egypt      | 0.31 |
| Morocco    | 0.34 |
| Bahrain    | 0.41 |
| Qatar      | 0.42 |
| Iraq       | 0.51 |
| S.Arabia   | 0.71 |
| Kuwait     | 0.96 |
| Palestine  | 1.20 |
| Syria      | 1.20 |
| World      | 1.30 |
| Jordan     | 1.40 |
| Lebanon    | 1.60 |
| UAE        | 1.60 |
| USA        | 4.60 |
| Europe     | 5.50 |

25-54

|            |       |
|------------|-------|
| Mauritania |       |
| Somalia    | 0.46  |
| UAE        | 0.60  |
| Bahrain    | 0.74  |
| Qatar      | 0.76  |
| Egypt      | 0.77  |
| Tunisia    | 0.81  |
| Oman       | 0.94  |
| Sudan      | 0.97  |
| Algeria    | 0.97  |
| Libya      | 1.10  |
| Kuwait     | 1.10  |
| Morocco    | 1.30  |
| S.Arabia   | 1.40  |
| Iraq       | 1.70  |
| World      | 3.00  |
| Jordan     | 3.00  |
| Palestine  | 3.30  |
| Syria      | 3.90  |
| Lebanon    | 7.40  |
| USA        | 9.30  |
| Europe     | 11.80 |

55-69

|            |      |
|------------|------|
| Qatar      |      |
| Oman       |      |
| UAE        |      |
| Palestine  |      |
| Egypt      | 0.39 |
| S.Arabia   | 0.40 |
| Tunisia    | 0.42 |
| Algeria    | 0.55 |
| Morocco    | 0.76 |
| Mauritania | 0.97 |
| Somalia    | 1.00 |
| Libya      | 1.00 |
| Iraq       | 1.10 |
| Syria      | 1.10 |
| Kuwait     | 1.30 |
| World      | 1.30 |
| Jordan     | 1.30 |
| Sudan      | 1.40 |
| Lebanon    | 1.50 |
| USA        | 2.10 |
| Bahrain    | 2.80 |
| Europe     | 2.90 |

70-85+

|            |      |
|------------|------|
| Qatar      |      |
| Oman       |      |
| UAE        |      |
| Palestine  |      |
| Mauritania |      |
| Somalia    |      |
| Libya      |      |
| Jordan     |      |
| Bahrain    |      |
| Morocco    | 0.28 |
| S.Arabia   | 0.59 |
| Egypt      | 0.64 |
| USA        | 0.88 |
| Algeria    | 0.94 |
| Iraq       | 0.94 |
| Sudan      | 0.98 |
| World      | 1.40 |
| Europe     | 1.50 |
| Tunisia    | 1.60 |
| Syria      | 1.80 |
| Kuwait     | 2.70 |
| Lebanon    | 2.70 |

# Thyroid

## Females

|            | 05-19 | 20-39           | 40-54          | 55-69          | 70-85+         |
|------------|-------|-----------------|----------------|----------------|----------------|
| Mauritania |       | Mauritania 0.76 | Mauritania 2.2 | Mauritania 5.3 | Mauritania 3.8 |
| Sudan      | 0.14  | Sudan 1.40      | Sudan 4.7      | Tunisia 6.6    | Bahrain 7.4    |
| Somalia    | 0.23  | Somalia 1.90    | Iraq 5.9       | Iraq 7.0       | Iraq 7.5       |
| Libya      | 0.24  | Libya 3.10      | Tunisia 6.3    | Libya 8.8      | Somalia 8.6    |
| Iraq       | 0.27  | Iraq 3.10       | Bahrain 6.5    | Bahrain 9.5    | Oman 8.7       |
| Kuwait     | 0.29  | Egypt 4.20      | Somalia 6.9    | Oman 9.8       | Sudan 10.5     |
| Egypt      | 0.41  | Tunisia 4.30    | Egypt 7.5      | Egypt 9.9      | Tunisia 11.0   |
| Algeria    | 0.56  | Bahrain 5.80    | Libya 7.6      | Sudan 11.4     | Qatar 12.8     |
| Tunisia    | 0.58  | Qatar 6.80      | Qatar 10.6     | Somalia 12.6   | Egypt 17.3     |
| Morocco    | 0.60  | UAE 6.90        | Oman 14.8      | Palestine 13.3 | Algeria 17.3   |
| Qatar      | 0.73  | Algeria 7.40    | Palestine 15.2 | Syria 14.6     | Syria 17.5     |
| Bahrain    | 0.83  | Morocco 8.00    | Syria 15.4     | Qatar 16.9     | Europe 17.5    |
| Palestine  | 0.84  | Palestine 9.00  | Jordan 16.5    | Lebanon 17.3   | World 18.5     |
| Lebanon    | 0.85  | Syria 9.20      | Algeria 16.7   | Jordan 18.5    | Lebanon 20.0   |
| World      | 0.89  | World 9.40      | Morocco 21.2   | Algeria 21.0   | Libya 20.2     |
| Syria      | 0.95  | Jordan 10.10    | UAE 22.3       | S.Arabia 23.6  | Jordan 22.3    |
| Jordan     | 1.10  | Oman 11.10      | World 22.5     | Morocco 23.8   | Morocco 22.7   |
| Oman       | 1.20  | Europe 12.10    | S.Arabia 23.0  | World 25.0     | S.Arabia 23.8  |
| S.Arabia   | 1.70  | Kuwait 13.00    | Europe 23.5    | Europe 25.6    | Kuwait 32.2    |
| Europe     | 1.80  | Lebanon 13.20   | Kuwait 24.7    | Kuwait 33.7    | Palestine 32.4 |
| UAE        | 1.80  | S.Arabia 13.90  | Lebanon 25.5   | USA 44.5       | USA 32.4       |
| USA        | 4.10  | USA 26.50       | USA 44.5       | UAE 49.7       | UAE 46.8       |

## Males

|            | 05-19 | 20-39          | 40-54           | 55-69          | 70-85+         |
|------------|-------|----------------|-----------------|----------------|----------------|
| Mauritania |       | Mauritania 1.1 | UAE 0.84        | Libya 1.1      | Qatar          |
| Bahrain    | 0.29  | Bahrain 1.1    | Mauritania 0.99 | Tunisia 1.8    | Mauritania 2.5 |
| Sudan      | 0.38  | UAE 1.4        | Bahrain 2.80    | Mauritania 2.5 | Libya 3.6      |
| Libya      | 0.41  | Tunisia 1.6    | Morocco 3.00    | Bahrain 2.6    | Oman 4.0       |
| UAE        | 0.56  | Sudan 1.9      | Kuwait 3.20     | Iraq 3.7       | Morocco 4.6    |
| Somalia    | 0.65  | Egypt 2.5      | Libya 3.30      | Jordan 3.7     | Tunisia 5.0    |
| Iraq       | 0.74  | Somalia 2.7    | Algeria 3.40    | Qatar 4.4      | Jordan 5.1     |
| Tunisia    | 0.80  | Libya 2.8      | S.Arabia 3.80   | Kuwait 4.6     | Egypt 5.5      |
| Qatar      | 0.83  | Morocco 3.0    | Jordan 3.90     | Palestine 4.6  | Somalia 5.8    |
| Morocco    | 0.91  | Algeria 3.0    | Qatar 4.00      | Egypt 4.9      | Iraq 6.1       |
| Egypt      | 0.92  | Kuwait 3.2     | World 4.60      | Somalia 4.9    | Syria 6.9      |
| Oman       | 0.97  | Iraq 3.3       | Tunisia 4.80    | Oman 5.0       | Algeria 7.2    |
| Kuwait     | 1.40  | Qatar 3.4      | Syria 4.90      | Sudan 5.4      | Palestine 7.3  |
| Algeria    | 1.40  | Oman 3.4       | Egypt 5.00      | Syria 5.6      | UAE 8.1        |
| Jordan     | 1.60  | Jordan 3.6     | Iraq 5.20       | Algeria 5.9    | World 9.1      |
| Syria      | 1.90  | Syria 4.9      | Somalia 5.30    | Morocco 6.3    | Europe 9.1     |
| Palestine  | 2.10  | Palestine 5.2  | Palestine 5.50  | World 8.8      | Kuwait 9.7     |
| World      | 2.30  | World 6.2      | Europe 6.00     | Lebanon 9.4    | Lebanon 9.8    |
| S.Arabia   | 2.80  | S.Arabia 6.3   | Oman 6.30       | Europe 9.5     | S.Arabia 13.2  |
| Europe     | 2.80  | Europe 6.6     | Lebanon 7.20    | UAE 10.3       | Sudan 13.3     |
| Lebanon    | 3.20  | Lebanon 8.4    | Sudan 8.90      | S.Arabia 10.9  | USA 17.0       |
| USA        | 5.80  | USA 13.3       | USA 9.10        | USA 17.6       | Bahrain 17.6   |

# Vagina

20-39

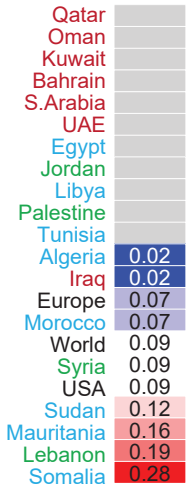

40-54

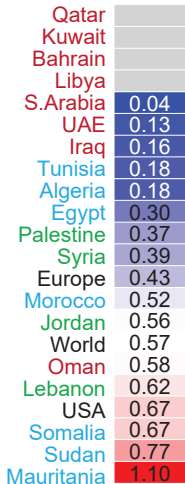

55-69

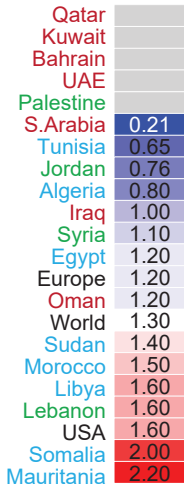

70-85+

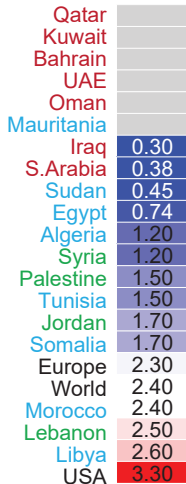

# Vulva

20-39

|            |      |
|------------|------|
| Qatar      |      |
| Kuwait     |      |
| Libya      |      |
| Bahrain    |      |
| Egypt      |      |
| UAE        |      |
| Iraq       | 0.02 |
| S.Arabia   | 0.02 |
| Algeria    | 0.05 |
| Jordan     | 0.07 |
| Morocco    | 0.07 |
| Tunisia    | 0.11 |
| Syria      | 0.12 |
| Oman       | 0.15 |
| Palestine  | 0.15 |
| Sudan      | 0.21 |
| Lebanon    | 0.25 |
| Mauritania | 0.30 |
| World      | 0.31 |
| Europe     | 0.40 |
| USA        | 0.42 |
| Somalia    | 0.64 |

40-54

|            |      |
|------------|------|
| Qatar      |      |
| Libya      |      |
| Bahrain    |      |
| UAE        |      |
| S.Arabia   | 0.16 |
| Kuwait     | 0.27 |
| Egypt      | 0.29 |
| Tunisia    | 0.34 |
| Palestine  | 0.37 |
| Algeria    | 0.39 |
| Jordan     | 0.42 |
| Iraq       | 0.48 |
| Mauritania | 0.70 |
| Syria      | 0.74 |
| Morocco    | 0.93 |
| Sudan      | 0.97 |
| World      | 1.10 |
| Lebanon    | 1.30 |
| Somalia    | 1.30 |
| Oman       | 1.40 |
| Europe     | 2.40 |
| USA        | 2.80 |

55-69

|            |      |
|------------|------|
| Qatar      |      |
| S.Arabia   | 0.34 |
| UAE        | 0.52 |
| Iraq       | 0.55 |
| Mauritania | 0.61 |
| Libya      | 0.69 |
| Palestine  | 0.85 |
| Algeria    | 0.86 |
| Kuwait     | 0.94 |
| Jordan     | 1.10 |
| Oman       | 1.20 |
| Bahrain    | 1.50 |
| Tunisia    | 1.50 |
| Egypt      | 1.60 |
| Syria      | 2.40 |
| World      | 2.80 |
| Morocco    | 3.70 |
| Somalia    | 4.80 |
| Europe     | 5.50 |
| Lebanon    | 5.70 |
| USA        | 6.00 |
| Sudan      | 6.30 |

70-85+

|            |       |
|------------|-------|
| Qatar      |       |
| Kuwait     |       |
| Oman       |       |
| UAE        |       |
| Bahrain    |       |
| Iraq       | 0.98  |
| S.Arabia   | 1.50  |
| Jordan     | 1.50  |
| Mauritania | 2.10  |
| Algeria    | 4.60  |
| Tunisia    | 5.20  |
| Somalia    | 6.00  |
| Egypt      | 6.50  |
| Palestine  | 6.80  |
| World      | 7.60  |
| Sudan      | 7.70  |
| Syria      | 7.80  |
| Libya      | 9.20  |
| USA        | 11.10 |
| Morocco    | 12.50 |
| Europe     | 15.10 |
| Lebanon    | 19.50 |
